# Supplementary material
Source: PubMed Central journal article supplement (PMC9933926)
Supplement: NEJMoa2209760_appendix.pdf [file NEJMoa2209760_appendix.pdf]

## Supplementary Appendix

Supplement to: Reis G, Silva EASM, Medeiros Silva DC, et al. Early treatment with pegylated interferon lambda for Covid-19. *N Engl J Med* 2023;388:518-28. DOI: 10.1056/NEJMoa2209760

This appendix has been provided by the authors to give readers additional information about the work.

|    |                                                                                                     |    |
|----|-----------------------------------------------------------------------------------------------------|----|
| 1  | <b>Table of Contents: Supplementary Information, Figures, and Tables</b>                            |    |
| 2  | Trial Infrastructure and the Extended TOGETHER investigators                                        | 3  |
| 3  | Supplemental Methods:                                                                               | 10 |
| 4  | <i>Description of Prolonged ER Visits and Modification of Primary Endpoint</i>                      | 10 |
| 5  | <i>Representativeness of study populations</i>                                                      | 11 |
| 6  | <i>Description of Statistical Methods</i>                                                           | 13 |
| 7  | <i>Description of Virological Assays</i>                                                            | 14 |
| 8  | <i>Viral kinetics Days 0-14 among patients in the Canadian cohort</i>                               | 15 |
| 9  | Figure S1: Mean SARS-CoV-2 viral load and viral load decline                                        | 15 |
| 10 | Figure S2: Proportion of patients negative for SARS-CoV-2 RNA per day after the injection           | 16 |
| 11 | Figure S3: Proportion of patients negative for SARS-CoV-2 RNA per day after injection and           |    |
| 12 | probability of testing negative by Day 7 based on baseline SARS-CoV-2 viral kinetics.               | 17 |
| 13 | Figure S4: Relative risk of being hospitalized or in observance in an emergency room for at least 6 |    |
| 14 | hours for peginterferon lambda versus placebo (early onset [0-3 days] subgroup)                     | 18 |
| 15 | Figure S5. Change in viral load from baseline, days 3 and 7.                                        | 19 |
| 16 | Table S1: Primary and secondary outcomes for peginterferon lambda versus placebo (ITT population)   |    |
| 17 |                                                                                                     | 20 |
| 18 | Table S2: Primary and secondary outcomes for peginterferon lambda versus placebo (Treated within 3  |    |
| 19 | days of symptom onset population)                                                                   | 21 |
| 20 | Table S3: Primary and secondary outcomes for peginterferon lambda versus placebo (Modified          |    |
| 21 | intention to treat population)                                                                      | 22 |
| 22 | Table S4: Primary and secondary outcomes for Peginterferon lambda versus placebo (Matched           |    |
| 23 | placebo population)                                                                                 | 23 |
| 24 | Table S5: Summary of 10 most frequent adverse events                                                | 24 |
| 25 | Table S6: Mortality due to any cause                                                                | 25 |
| 26 | Table S7: Representativeness of Study Participants                                                  | 26 |
| 27 | Table S8: Adverse events by grade, MEDRA type and treatment group                                   | 27 |
| 28 | Table S9: Primary outcome results by site                                                           | 28 |
| 29 | Table S10. Frequentist ITT analysis                                                                 | 29 |
| 30 | Table S11. Demographics of COVID-19 Cases in the US                                                 | 30 |
| 31 | Listing 1: Deaths, serious treatment emergent adverse events and other significant events           | 31 |

|    |                                                                                                |    |
|----|------------------------------------------------------------------------------------------------|----|
| 32 | Listing 2: Treatment emergent adverse events unlikely related, possibly related, or related to |    |
| 33 | intervention                                                                                   | 39 |
| 34 | Instrument for assessing the Credibility of Effect Modification Analyses (ICEMAN)              | 42 |
| 35 | References                                                                                     | 44 |
| 36 |                                                                                                |    |

37 **Trial Infrastructure and the Extended TOGETHER investigators**

38

39 The COVID-19 TOGETHER Trial initiative was designed to evaluate repurposed treatments  
40 for COVID-19 disease through an adaptive trial design in two arms being conducted in Brazil  
41 and Canada. The trial is supported by a network of primary care research centers located in the  
42 state of Minas Gerais, Brazil and several sites in Toronto, Canada, devoted to a comprehensive  
43 evaluation and treatment of patients with COVID-19. The trial was fully integrated with local  
44 public health authorities (Brazilian Unified Health System – SUS) as part of coping strategy  
45 for COVID-19 pandemic. Namely, the main institutions involved were: Cardresearch –  
46 Cardiologia Assistencial e de Pesquisa and Toronto Centre for Liver Disease, University Health  
47 Network, Michael Garron Hospital, Sunnybrook Health Science Centre, Trillium Health  
48 Partners, Women’s College Hospital. This initiative is funded by FastGrants, The Rainwater  
49 Foundation, Eiger BioPharmaceuticals and the FTX Foundation.

50

51 The TOGETHER Trial consortium is a partnership between academics and clinicians at  
52 McMaster University in Ontario, Canada, and Pontificia Universidade Catolica de Minas  
53 Gerais, Claros State University, University of Ouro Preto in Minas Gerais, Brazil and  
54 University Health Network in Ontario, Canada. Other partners include Cytel, Platform Life  
55 Sciences, MMS Holdings, WHO Therapeutic Guidelines Committee, and the Society for  
56 Clinical Trials.

57

58 **Brazilian Executive Committee**

59 Gilmar Reis<sup>1,2</sup>, Eduardo ASM Silva<sup>1,2</sup>, Daniela CM Silva<sup>1,2</sup>, Castilho VQ Santos<sup>2</sup>, Ana MR  
60 Nogueira<sup>3</sup>, Ana PFG Almeida<sup>3</sup>, Adhemar DF Neto<sup>4</sup>, Leonardo CM Savassi<sup>5</sup>, Luciene B  
61 Ribeiro<sup>1</sup>, Maria IC Simplicio<sup>1</sup>, Thiago S Ferreira<sup>1</sup> Vitoria HS Campos<sup>1,2</sup>.

62

63 **Steering and Executive Committee**

64 Gilmar Reis<sup>1,2</sup>, Lehana Thabane<sup>6</sup>, Jamie Forrest<sup>7,8</sup>, Edward J Mills<sup>6,7</sup>

65

66 <sup>1</sup>Cardresearch – Cardiologia Assistencial e de Pesquisa, Belo Horizonte, Brazil; <sup>2</sup>Pontificia  
67 Universidade Catolica de Minas Gerais, Belo Horizonte; <sup>3</sup>Department of Public Health at  
68 UniFipMoc and Family Medicine Fellowship, City of Montes Claros, Brazil; <sup>4</sup>Federal  
69 University of Juiz de Fora, Governador Valadares, Brazil; <sup>5</sup>Federal University of Ouro Preto,  
70 Ouro Preto, Brazil; <sup>6</sup>McMaster University, Hamilton, Canada, <sup>7</sup>Cytel Health, Vancouver,  
71 Canada, <sup>8</sup>University of British Columbia, Vancouver, Canada.

72

73 **Data Safety and Monitoring Committee**

74 William Cameron, University of Ottawa (Canada), James Orbinski, York University (Canada),  
75 Sonal Singh, University of Massachusetts (USA), Kristian Thorlund, McMaster University  
76 (Canada), Jonas Haggstrom of Cytel Inc. (Sweden).

77

78 **Clinical Events Classification Committee**

79 Gilmar Reis<sup>1,2</sup> (chair), Luciene B Ribeiro<sup>1</sup> (adjudicator), Thiago S Ferreira<sup>1</sup> (adjudicator), Ana  
80 MR Nogueira (adjudicator)<sup>1</sup>, Laura C Oliveira<sup>1</sup> (operations manager), Heloísa A Costa<sup>1</sup>  
81 (operations manager), Daniela CM Silva (adjudicator)<sup>1</sup>, Eduardo ASM Silva (adjudicator).<sup>1</sup>

82

83 <sup>1</sup>Cardresearch – Cardiologia Assistencial e de Pesquisa, Belo Horizonte, Brazil; <sup>2</sup>Pontificia  
84 Universidade Catolica de Minas Gerais, Belo Horizonte, Brazil.

85

## 86 **Trial Operations**

87 Maria IS Simplicio<sup>1</sup> (site manager), Thais C Siqueira<sup>1</sup> (site monitoring), Nayara S Drumont<sup>1</sup>  
88 (site monitoring), Leticia C. Siqueira<sup>1</sup> (site monitoring), Stephanny K Bessa<sup>1</sup> (site monitoring),  
89 João VB Vieira<sup>1</sup> (telemonitoring manager), Kenia SG Gonçalves<sup>1</sup> (site monitoring), Laura C  
90 Oliveira<sup>1</sup> (operations manager), Heloisa A Costa<sup>1</sup> (operations manager), Vania R Campos<sup>1</sup>  
91 (administrative manager), Aline LJ Martins<sup>1</sup> (logistic manager), Rosemary M Oliveira<sup>1</sup>  
92 (international affairs manager), Carla SO França<sup>1</sup> (data management), Aline C Milagres<sup>1</sup> (data  
93 management), Luciene B Ribeiro<sup>1</sup> (regulatory affairs manager), Tainara S Vieira<sup>1</sup> (regulatory  
94 affairs), Lineria HM Suterio <sup>1</sup> (pharmaceutical operations manager), Josue Rodrigues Silva<sup>2</sup>  
95 (director of clinical operations)

96

97 1) Cardresearch – Cardiologia Assistencial e de Pesquisa, Belo Horizonte, Brazil.

98 2) Platform Life Sciences, Vancouver, Canada.

99

## 100 **Virology laboratory**

101 Adelino de melo Freire Junior<sup>1</sup> (clinical director), Ana Carolina Fialho Dias Rocha (director,  
102 immunology division)<sup>1</sup>, Ana Paula de Faria Gonçalves<sup>1</sup>, Andressa França<sup>1</sup>, Carlos Eduardo Dias  
103 Igídio<sup>1</sup>, Igor César de Oliveira Sousa<sup>1</sup>, Iracema Luisa Quintino de Carvalho<sup>1</sup>, Larissa Maria Manini  
104 Benavides<sup>1</sup>, Patrícia de Oliveira Pereira<sup>1</sup>, Phelipy Marques de Sousa<sup>1</sup>, Sabrina de Almeida Lima<sup>1</sup>, Silvia  
105 Helena Sousa Pietra Pedroso<sup>1</sup>, Snaydia Viegas Resende<sup>1</sup>, Wellington da Silva Rocha<sup>1</sup>, Thamiris  
106 Caldeira Alves<sup>1</sup>

107 1) Target – Medicina de Precisão, Belo Horizonte, Brazil

108

## 109 ***Participating Enrolling Centres***

110 Included below are representatives from the enrolling centres at participating cities that  
111 enrolled at least 1 patient. Centres are listed in order of enrolment contribution. All study  
112 sites were located in the State of Minas Gerais, Brazil or Ontario, Canada.

113

## 114 **Cardresearch – Cardiologia Assistencial e de Pesquisa, Belo Horizonte**

115

116 Aline Lúcia de Jesus Martins, Amanda Gouvêa Mesquita, Amanda Larissa Alves Mendes,  
117 Anna Beatriz Oliveira Mendes, Anna Clara de Jesus Oliveira, Barbara Nogueira Roberti,  
118 Carolina Couto de Azevedo Cysne, Clara Bensemman Gontijo Pereira, Cecília Campos  
119 Siqueira, Ednilson Barbosa Dias, Emanuelle Cristina Soares Gonçalves, Fernanda Leal

120 Guimarães, Flávio Eduardo Giorgeto, Gabriel Torga Saade Rodrigues, Gislânia Neres de  
121 Sousa, Júlia Campos de Rezende, Júlia Diniz Assis Moreira, Heloisa Alves Costa, Isabela  
122 Canabrava Soares, João Victor Barbosa Silveira, Joselaine Gomes de Souza, Juliana Marques  
123 Santos Ferreira, Kênia Stéfane Guimarães Gonçalves, Laura Campos Oliveira, Layane  
124 Maria de Almeida, Letícia Campos Siqueira, Letícia de Fátimas Costa, Lorena Gabrielle  
125 Miranda Maciel, Lorena Giovanna Silva Peixoto, Lorena Mesquita Alves, Luana Rosa  
126 Rodrigues, Luciene Barra Ribeiro, Luisa Andrade de Almeida, Marcela Luíza Amaral Resende  
127 Lara, Luíza Lanna França Reis, Marcela Luiza Amaral Resenda lara, Maria Izabel Campos  
128 Simplício, Maria Eduarda Gomes Horácio, Maria Eduarda Martins Soares, Maria Luiza  
129 Magalhães Parreiras, Mariana Campos Siqueira, Mariana Cristina Flores Mariano, Marina  
130 Guimarães Bragatto, Matheus Andrade Almeida e Silva, Mayra Estefane Silva dos Santos,  
131 Mirele Augusta Batista Ribeiro, Nayara Santos Drumond, Pedro Hosken Fernandes  
132 Guimarães, Pollyana Maria Silva Diniz, Roberta Dumont Paiva Lopes, Rosemary Muniz de  
133 Oliveira, Stephanny Kelvyn Bessa, Sheila Soares Anselmo, Tainara Silva Vieira, Tatiana  
134 Aparecida Gomes da Silva, Thiago Santiago Ferreira, Thais Campos Siqueira, Vânia Regina  
135 Carmo, Vitor Augusto Lima do Vale, Vitor Vilaça Oliveira, Wedsley Sander Lopes dos Santos  
136

### 137 **City of Santa Luzia**

138

139 Aline Daniele de Almeida Abreu, Bernardo Saraiva Resende de Camargos, Camila Araújo  
140 Heringer, Daniel Jacinto Mendonça Filho, Eriane Damasia Faria de Almeida Abreu, Felipe  
141 augusto Pereira Barnabé, Felipe Alves Vieira, Gabriella Fagundes Carvalho, Higor Gomes  
142 Mussi, Hilton Cardoso Arruda Macedo, Igor Bernardes Caciquinho, João Pedro Ribeiro  
143 Santos, João Ricardo Garcia Costa, José Lauro Guimarães Cardoso, Júlia Berlim de Abreu,  
144 Lorena Rodrigues de Carvalho, Lorena Amaral de Oliveira, Luana Rocha Oliveira Matos,  
145 Marcela Ferreira Brito, Mariana Cavaliere Batista e Silva, Matheus Lucca Ângelo Costa  
146 Rodrigues, Mateus de Oliveira Ferreira, Murilo Passinati Perez, Natalia Batista Zanetti, Rafaela  
147 Ribeiro de Almeida, Sarah Jeniffer da Silva Jamar, Sofia Caporalli Barbosa, Sofia Vianna Von  
148 Bentzeen Rios, Stella Silva Rosa, Thomaz Takashi Ferreira Morimoto, Verônica de Araújo  
149 Libânio costa, Vitória Helena de Souza Campos, Vitor Augusto Alves da Silva

150

### 151 **City of Betim**

152

153 Amanda Cypestre Alves Batista, Ana Flávia Gomes Viana, Ângela Rodrigues Vieira Santos,  
154 Anna Luiza Ribeiro Flores, Arthur Guimarães Rodrigues Dutra, Bruna Luiza Maia, Clarisse  
155 Lourdes Nadú de Almeida, Daniel Domingues Barbosa, Daniela Carla Medeiros, Daniele  
156 Saionara da Silva, Diuly Ane Faria Rezende, Eduardo Augusto dos Santos Moreira Silva,  
157 Felipe Menezes Andrade, Fernanda Rúbia Batista, Gabriela Ferreira Reis, Giovane Carvalho  
158 Constantino Ferreira de Paula, Geovani de Araújo Júnior, Henrique Amaral Fonseca Pires,  
159 Jéssica Aguilar Silva, Isabela Lovatti Rovetta, João Pedro Ribeiro Santos, Júlia Silva Rangel,  
160 Júlia Lima Soares de Paula, Juliana Oliveira Costa, Lucas Júnio da Silva, Luiz Gustavo  
161 Fernandes Dias, Livia Francino Oliveira, Lucas Rodrigues Pereira Barros, Lucas de Souza  
162 Gontijo Pessoa, Lucas Klier Silva, Maria Luisa Lara Lanza Stabile, Mariana da Rocha Assis  
163 Pinto, Nicholas Vanzin Cunha, Paloma Alister Vilela da Silva, Rafael Silva Rodrigues Soares,

164 Thais Gomes de Oliveira, Victor Oliveira de Araújo, Vitor Augusto Alves da Silva, Wesley  
165 Costa Arcanjo.

166 **City of Nova Lima**

167

168 Alice Pinheiro Vanetti, Ana Carolina Araújo Lage Santos, Ariade Gomes Freitas, Felipe Viana  
169 Santos, Fernanda Freitas Pinheiro, Fernanda Perez Rocha, Filipe Viana Santos, Giulia de Jesus  
170 Marcolino, Henrique Amaral Fonseca Pires, Humberto Drumond Filho, Isabela Gontijo  
171 Mendonça, Isadora Gomides Faria, José Victor Mendes Milhomem, Larissa Milagres Mol,  
172 Letícia de Fátima Costa, Luana Rocha Oliveira Matos, Marcelo Bernardes Rocha Júnior, Maria  
173 Constâncio Miranda, Nathália Euclides Gonçalves, Suzana Cristina Ricco, Thiago Araújo do  
174 Nascimento

175

176 **City of Sete Lagoas**

177

178 Amanda Luiza do Espírito Santo Pinheiro, Ana Carolina Matos Ferreira, Ana Caroline Santos  
179 Silva, Ana Luiza Silva Taveira, Bruno Victor de Souza Lima, Castilho Vitor Quirino dos  
180 Santos, Débora Siqueira Diana, Emanuela Pontes Pereira Silveira, Francisca Lina Campos  
181 Gonçalves, Gabriel Corrêa Costa, Geraldo César Barroso de Souza, Guilherme Aurelio  
182 D'Oliveira Alves, Isadora Luiza Teixeira Neto, Jordanna Porto Inácio, José Paulo Ribeiro  
183 Silvério, Lara Silveira Marques, Larissa Martins do Nascimento, Larissa Oliveira Moreira,  
184 Lorena Luiza Soares de Oliveira, Lucas Eduardo Lessa Mussi, Lucas Medeiros Ruas, Luiza  
185 Nogueira Assis Barbosa, Luiz Otávio de Sousa, Marcelo Rodrigues da Costa Fernandes, Maria  
186 Eduarda Guimarães de Souza, Maria Thereza Figueiredo Bélem Calazans, Mariana Rodrigues  
187 Marinho de Bastos, Pedro Henrique Arcanjo Alvarenga, Quimberli Vassinave Cujuí, Rafaela  
188 Valadares Diniz, Rafael Cota Andrade Ferreira de Souza, Rita de Cássia Silva, Vinícius Alves  
189 Corrêa, Vinícius Carvalho de Oliveira, Vitória Aparecida Cunha, Viviane Costa Santos

190

191 **UniFIPMoc - City of Montes Claros**

192

193 Ana Maria Ribeiro Nogueira, Ana Paula Figueiredo Guimarães de Almeida, Ana Paula  
194 Guimarães Alves de Carvalho, Antônio Henrique Batista Jorge, Artur Pimenta Ribeiro,  
195 Elisângela Santos Sena, Cleide Rocha Veloso, Gonçalves Eleutério Murta, Inara Maria  
196 Gomes Cardoso, João Warley Alves, Jorge Fernando Rocha Veloso, Joyce Souto Barbosa  
197 Pimenta de Figueiredo, Karolina Campos Sampaio Lopes, Larissa Vieira Souza, Loren  
198 Montanha Costa, Ludimila Pereira de Souza, Maria de Fátima César Lima, Maria Isabel  
199 Silveira Gonçalves, Marizete Gisllaine Mendes, Mayra Darlliane Loiola Silva, Nayara Santos  
200 Drumond, Raissa Rocha e Fonseca, Samuel de Paiva Oliveira, Thiago Rodrigues Ferro

201

202 **City of Ibirité**

203

204 Aline Cruz Milagres, Ana Carolina Aguiar Estevam, Ana Martins de Oliveira, André Henrique  
205 de Sousa Oliveira, Carina Bitarães, Carla Stefany Oliveira França, Hayka K. Rodrigues Freire,  
206 Laís Aparecida dos Reis Gama, Laylla Michelle Pereira, Luciléia Alcântara Gomes e Silva,

207 Patrícia Santana Assis, Regiane Aparecida de Andrade, Thaís de Paula Ferreira da Silva,  
208 Thiago de Alcântara César

209 **City of Governador Valadares**

210

211 Adhemar Dias de Figueiredo Neto, Adriana Marcos Mendes Rabelo, Aline do Carmo Rosa,  
212 Ana Paula Vilas Boas Wherberth, André Gustavo Pinto de Souza, André Luiz Souza Gomes,  
213 Arthur Henrique Nunes Leite Oliveira, André Gustavo Pinto de Souza, Damiana Rogai  
214 Siqueira, Emanuel Peixoto Pinto, Felipe Coelho Soares de Oliveira, Felipe Fraga Damaceno,  
215 Guilherme Rhis, Iandra Silva Almeida, Igor Barros de Araújo Borges, Igor Brandão Rocha,  
216 Jéssica Genoveva Boline Passarelli Capaz Pinto da Silva, Jorge Carlos do Amaral Júnior, José  
217 Pio Marques II, Laura Lima Vargas, Lorena Cristina Ferreira Batista, Luiz Eduardo Coelho  
218 Fava, Luiza de Azevedo Freitas Giles, Marina Lacerda Marques, Maura Alina Morais  
219 Veríssimo, Neila Rodrigues Vargas de Paula, Pâmela de Sousa Dias Demuner, Ramail Santos  
220 Pouzas, Roberta Coelho de Marco, Rafaella Rosa de Oliveira Fernandes, Ronan Figueiredo  
221 Mourão, Sabrina Stefany da Silva Souza, Sara Silva Ferraz

222

223

224 **City of Brumadinho**

225

226 Ana Beatriz Amorim, Carolina Francisca Martins, Eduardo Diniz Callegari, Geovanna Carla  
227 Cordeiro, Huisnei Ferreira Lourenço, João Victor Fagundes dos Santos, João Pedro Donato  
228 Veloso, Júlia Alves Santos, Júlia senra Nogueira, Jussara Carolina Assis Ribeiro Nascimento,  
229 Lavínia de Fátima Baldim Martins, Lucca Batista Rocha de Menezes, Maria Clara Damaso da  
230 Silva, Mariana das Graças de Aquino Santos, Rafael Augusto de Carvalho Leão, Solange  
231 Santos Moreira Sales, Vitor Franco Moreira

232

233

234 **City of Igarapé**

235

236 Amanda Diniz Friedmann, Barbara Carvalho Chaves, Janaína Leyner de Andrade Oliveira,  
237 Júlia Silva Diniz, Luiz Felipe de Oliveira Braga, Luiza Gabriele Dutra Duarte, Marcela Julia  
238 Rufino Duque, Mariana Cristina Flores Emiliano, Rafaela Carolina Silveira, Virgínia Mara  
239 Santos Moreira

240

241 **Federal University of Ouro Preto, City of Ouro Preto**

242

243 Aline Dias Bedetti, Amanda Faria Simoni Campos, Andressa de Almeida, Anna Carolina  
244 Motta Costa, Clara Tornelli de Almeida Cunha, Cristiana Silva Mascarenhas, Daniel Ananias  
245 da silva, Diana Antoniazzi de Sá Ribeiro, Diana Luiza Marinho Brandão, Érico Henrique  
246 Araújo de Moraes, Felipe César Soares, Flávia Marcella Sena Gonçalves Borba, Karinna  
247 Guimarães Gomes, Leonardo Caçado Monteiro Savassi, Marco Wellington Junio Estevam,  
248 Matheus Ramos Lopes, Marina Eduarda Santos, Maryane de Oliveira Silva, Nágella Samara



|     |                                                                                               |
|-----|-----------------------------------------------------------------------------------------------|
| 249 | Eleutério da Silva, Rafael Rocha Carneir, Rayane Elen Fernandes Silva, Ruan Carling Schott    |
| 250 | Wondollinger, Yuri Barbosa de Menezes                                                         |
| 251 |                                                                                               |
| 252 | <b>Santa Casa de Misericórdia, City of Sabará</b>                                             |
| 253 |                                                                                               |
| 254 | Bárbara Ellen Souza Rezende, Catarina Giovanna Simões Costa, Gabriel Antônio Simões           |
| 255 | Costa, Gabriel Marcos theodoro Cardoso, Graziela César de Sousa, Grazielle Aparecida Silva,   |
| 256 | Isabela Cristina de Oliveira Campos, Lara Silva Souza, Laura Nacife Rabello, Mariana Cristina |
| 257 | Flores Emiliano, Roberta Ellen Santos Oliveira                                                |
| 258 |                                                                                               |
| 259 | <b>Santa Rita Hospital, City of Contagem</b>                                                  |
| 260 |                                                                                               |
| 261 | Anna Clara de Jesus Oliveira, Bárbara Nogueira Roberti, Bruno Reis Garcia, Bruno Rocha        |
| 262 | Gelape, Carina Daniela Lira Moreira Figueiredo, Clara Bensemman Gontijo Pereira, Giulia de    |
| 263 | Jesus Marcolino, João Vitor Rocha Cachoeira, Júlia Romano Ferreira Santos, Sarah de Resende   |
| 264 | Silva, thalita Oliva Rios, Vitor Augusto Lima do Vale, Túlio Fonseca e Silva Quadros          |
| 265 |                                                                                               |
| 266 | <b>Toronto Centre for Liver Disease, University Health Network</b>                            |
| 267 |                                                                                               |
| 268 | Bethany Barber, Camelia Capraru, Camille Lemieux, Daniel Li, David Smookler, Joshua           |
| 269 | Booth, Magdalena Kuczynski, Maria Kristina Marquez, Seham Noureldin, Shinthuka                |
| 270 | Jeganathan, Tharmegan Tharmaratnam, Wesam Aleyadeh                                            |
| 271 |                                                                                               |
| 272 |                                                                                               |
| 273 | <i>Acknowledgement for our partners in Canada</i>                                             |
| 274 |                                                                                               |
| 275 | <b>Michael Garron Hosptal:</b>                                                                |
| 276 | Jeff Powis, Maureen Taylor                                                                    |
| 277 |                                                                                               |
| 278 | <b>Sunnybrook Health Science Centre:</b>                                                      |
| 279 | Adrienne Chan, Elsa Salvant                                                                   |
| 280 |                                                                                               |
| 281 | <b>Trillium Health Partners</b>                                                               |
| 282 | Christopher Graham                                                                            |
| 283 |                                                                                               |
| 284 | <b>Women’s College Hospital</b>                                                               |
| 285 | Marc Dagher                                                                                   |
| 286 |                                                                                               |
| 287 |                                                                                               |
| 288 |                                                                                               |

289 **Public health authorities and mayors**

290 We are in debt with the following local public health authorities and mayors (listed by  
291 enrollment):

292

293 ***City of Ibité***

294 William Parreira Duarte (Mayor), Carina Bitarães (public health authority)

295

296 ***City of Sete Lagoas***

297 Duílio de Castro (Mayor), Flávio Pimenta Silveira (public health authority), Alber Alípio  
298 Ribeiro (public health authority)

299

300 ***City of Betim***

301 Vittorio Medioli (Mayor), Augusto Viana da Rocha (public health authority), Hilton Soares de  
302 Oliveira, Tânia Maria de Resende Amaral (public health authority)

303

304 ***City of Santa Luzia***

305 Christiano Augusto Xavier Pereira (Mayor) Nádia Cristina Dias Duarte Tomé (public health  
306 authority)

307

308 ***City of Nova Lima***

309 João Marcelo Diegues Pereira (Mayor), Diogo Jonata Ribeiro (public health authority)

310

311 ***City of Montes Claros***

312 Humberto Guimarães Souto (Mayor), Dulce Pimenta Gonçalves (public health authority)

313

314 ***City of Brumadinho***

315 Avimar de Melo Barcelos (Mayor), Eduardo Diniz Callegari (public health authority)

316

317 ***City of Governador Valadares***

318 André Luiz Coelho Merlo (Mayor), Edna Gomes Leite, Caroline Martins Sangali (public health  
319 authority)

320

321 ***City of Ouro Preto***

322 Angelo Oswaldo de Araujo Santos (Mayor), Glauciane Resende do Nascimento (public health  
323 authority)

324

325

326

327 **Supplemental Methods:**

328

329 **Description of Prolonged ER Visits and Modification of Primary Endpoint**

330

331 When we initially proposed the study, we defined one of the endpoints as emergency care  
332 extended treatment of at least 12 hours. However, during the initial weeks of the trial, we  
333 found that patients rarely stayed for more than 12 hours at emergency units for extended care  
334 and later discharged home due to the progressive overcrowding of emergency units and  
335 referral centers for COVID-19. From March 2021, the health units in Minas Gerais State in  
336 Brazil experienced a depletion of their hospital bed capacities with >90% occupancy. During  
337 the period from May to mid-July 2021, there was >100% occupancy of available hospital  
338 beds, leading to situations of “hospitalization” in the corridors of the units as there were no  
339 longer available hospital beds.

340

341 The lack of available hospitals to accommodate patients with moderate to severe COVID-19  
342 was then reflected in the emergency units, where the only option available to frontline  
343 medical teams was to release patients as quickly as possible to give others the opportunity to  
344 be treated with a minimum decent standard of medical care.

345

346 Thus, patients presenting with O<sub>2</sub> saturation between 85-93% and dyspnea without overt  
347 respiratory failure (i.e. FDA criteria of severe COVID-19)<sup>1</sup> were treated, undergoing initial  
348 respiratory stabilization which included high-dose intravenous corticosteroids, supplemental  
349 oxygen, full inhalation therapy, and sometimes antibiotics, and a short stay at ER observation  
350 bed unit to monitor O<sub>2</sub> saturation and assess for progressive deterioration of respiratory  
351 status.

352

353 Usually after 4-6 hours, these patients under ER observation were re-evaluated with a  
354 decision made for being discharge home or hospitalized. In general, many ER patients were  
355 discharged home in less than 6 hours, and the majority of patients were discharged in less  
356 than 12 hours so long as they were able to maintain their O<sub>2</sub> saturation at ≥ 90%. Patients  
357 discharged after prolonged ER observation were followed at a homecare program designed  
358 especially for persons with COVID-19. Persons unable to be maintain their O<sub>2</sub> saturations  
359 above 90% were prioritized for hospital admission.

360

361 *Rational for modification of primary endpoint:* Due to the limitations in health system  
362 capacity, we realized that a minimum observation period of 12 hours was unrealistic to  
363 capture participants with moderate/severe COVID-19. For this reason, we asked the National  
364 Research Ethics Commission in Brazil to modify the protocol endpoint to be at least 6 hours  
365 of ER observation instead of 12 hours. This change, based on the real world of care provided  
366 by the public emergency services of the Health System, was approved. This change was  
367 registered on clinicaltrials.gov on March 21, 2021. No data were analyzed prior to this  
368 change, and all blinding was maintained.

369

370 These persons presenting with O<sub>2</sub> saturation between 85-93% and dyspnea who underwent >  
371 6 hours of observation are consistent with the U.S. FDA definition of severe COVID-19.<sup>1</sup>

372

- 373 • Symptoms suggestive of severe systemic illness with COVID-19, which could include any symptom of moderate illness or shortness of breath at rest, or respiratory distress

- 374 • Clinical signs indicative of severe systemic illness with COVID-19, such as  
375 respiratory rate  $\geq 30$  per minute, heart rate  $\geq 125$  per minute, SpO<sub>2</sub>  $\leq 93\%$  on room air  
376 at sea level or PaO<sub>2</sub>/FiO<sub>2</sub>  $< 300$

377

## 378 **Representativeness of study populations**

379 The TOGETHER data can be generalized to the US population for the following reasons:

### 380 1. Populations at risk for COVID-19 morbidity and mortality

381 The populations most at risk for COVID-19 morbidity and mortality are Hispanic, Black, and  
382 American Indian / Alaska Native (AIAN) peoples. Approximately 18% (50.5 million) of the  
383 US population is Hispanic and 12.4% (41.1 million) is Black, collectively making up over  
384 30% of the total US population.

385 The most recent demographic data from the CDC (<https://covid.cdc.gov/covid-data-tracker/#demographics>) indicate the following:

- 387 • Hispanic people represent a larger proportion of COVID-19 cases relative to their  
388 proportion of the population (24% vs 18%, respectively).
- 389 • Black people account for approximately 13% of cases and 13% of deaths due to  
390 COVID-19.
- 391 • The largest number of cases are observed in the 18-64 years-old age group. When  
392 adjusted for age, Hispanic, Black, and AIAN people are about 2-times more likely to  
393 die from COVID-19 compared to White people, and Hispanic and AIAN people are  
394 1.5-times greater risk of COVID-19 infection than White people.
- 395 • There are also large disparities in death and hospitalization for AIAN, Black, and  
396 Hispanic people. Hispanic, Black, and AIAN people are almost 3-times as likely to  
397 die from COVID-19 and about 4-times as likely to be hospitalized for COVID-19 as  
398 White people.

399 The population in the TOGETHER study is drawn from 12 sites in Brazil and five sites in  
400 Canada. It is primarily composed of patients from these high-risk groups:

- 401 • Black/African American: 1.9%, Brazil alone and Brazil + Toronto combined
- 402 • Hispanic/Latino: 94.8% Brazil alone, 96.4% Brazil + Toronto combined
- 403 • The majority of patients were aged 18-69 (95.6% Brazil, 95.3% Brazil + Toronto  
404 combined)

### 405 2. Risk factors for COVID-19-related morbidity and mortality

406 It is estimated that 41.9% of the US population is obese  
407 (<https://www.cdc.gov/obesity/data/adult.html>). The proportion of obese patients in the Brazil  
408 as well as Brazil + Canada combined populations was 38.1%.

### 409 3. Vaccination status and vaccine type

410 It is estimated that 80.3% of the US population have received at least one dose of a vaccine.

411 Approximately 84% of the TOGETHER study population (Brazil alone and Brazil + Canada  
412 combined) had received at least one dose of a vaccine.

413 Lambda was effective and improved clinical outcomes in the sub-group of vaccinated  
414 patients (primary endpoint RR 0.54, CrI [0.31, 0.91], Pr 0.991).

415 Directly relevant to the US population is the type of vaccine. A total of 56.6% of the  
416 vaccinated patients from Brazil received either the AstraZeneca (47.7%) or Pfizer (20.3%)  
417 vaccine. The Moderna vaccine was most common among patients from Canada. Among  
418 those patients who received the AstraZeneca or Pfizer vaccine, the RR for the primary  
419 endpoint was 0.43, CrI [0.20, 0.86].

420 Vaccination rates are much lower among the high-risk populations compared to White  
421 people. According to the most recent CDC data, unvaccinated people are 6-times more likely  
422 to die from COVID-19. Only 21% of Hispanics and 10% of Black people are vaccinated  
423 (<https://covid.cdc.gov/covid-data-tracker/#vaccination-demographic>). Lambda was equally  
424 effective among patients who were unvaccinated: RR primary endpoint 0.45, CrI [0.18, 0.99].

#### 425 4. SARS-CoV-2 Variants of Concern

426 The Delta and Omicron variants were the most recent variants of concern in the US, with new  
427 Omicron variants now being reported with increasing frequency. Lambda is effective against  
428 multiple variants of the SARS-CoV-2 virus. The mechanism of action makes it unlikely that  
429 resistance to treatment will emerge.

430 A temporal analysis of the effect of Lambda overtime accounting for different variants of the  
431 SARS-CoV-2 virus was previously submitted (IND154,118 SN0008, module 1.11.3). Briefly,  
432 three variants of concern predominated during the course of the TOGETHER study in Brazil:  
433 Delta, Gamma, and Omicron. In Canada the Omicron variant was the major variant of  
434 concern.

435 Lambda was effective against all three variants of concern:

- 436 • The relative risk reduction (RRR) during the Delta period (46%)
- 437 • The RRR was lower in the Gamma variant period (25%), which had a smaller sample  
438 size than the other time intervals.
- 439 • The RRR improved to 83% risk during the period in which the Omicron variant was  
440 dominant.

441 Collectively, these data indicate the results of the TOGETHER study are directly applicable  
442 to the US population.

443

444

445

## 446 **Description of Statistical Methods**

447

448 All analyses involving dichotomous outcomes, including the primary outcome, were  
449 performed using the Bayesian beta-binomial model with uniform prior distributions for the  
450 individual arm event rates. Relative risks and posterior efficacy were evaluated based on size  
451  $10^6$  Monte Carlo samples from the resultant Beta posterior distributions. The choice of prior  
452 distribution was a Beta distribution because it is a conjugate prior for a Binomial likelihood.  
453 This was critical to allowing for interim analyses updates to be made using analyses that  
454 reflected prior interim analyses and allowing for simulations that allowed to control for  
455 multiplicity. The posterior distribution is then solved for using a closed-form equation based  
456 on its relationship to priors and posteriors. Summaries were derived using Monte Carlo  
457 samples from the posterior distributions of the two arms. The choice of uniform priors was, in  
458 part, made to minimize the impact of prior information, or lack thereof, on the statistical  
459 inference. However, given the study size, no major impact of said choice was expected on the  
460 estimation, while interim analysis decision boundaries were calibrated to meet frequentist  
461 criteria of power and type I error rate. See the statistical analysis plan for more detail.

462

463 Time-to-event analyses that were not adjusted for competing risks, and numeric secondary  
464 outcomes, were performed using the default Bayesian implementation of the Cox  
465 proportional hazards model in the *brms* R library<sup>2</sup> with four independent Markov Chain  
466 Monte Carlo (MCMC) chains of size 4,000 each and a flat prior distribution assigned to the  
467 treatment assignment coefficient. The likelihood is a function of the hazard rate, cumulative  
468 hazard and survival probability as described here (<https://arxiv.org/pdf/2002.09633.pdf>). The  
469 prior and posterior distributions for each of the parameters were Normally distributed.  
470 Posterior distributions were estimated using the Hamiltonian Monte Carlo, which is a form of  
471 Markov Chain Monte Carlo in which information about the gradient of the log posterior is  
472 used to more efficiently sample from the posterior space. This was implemented in Stan using  
473 the No-U-Turn Sampler (NUTS).

474

475 A longitudinal mixed effects linear regression, with participant entered as a random effect, was  
476 used to evaluate the antiviral effect over time. Due to the rapidly changing nature of COVID,  
477 the variant of concern changed during the study period. Therefore, we categorized patients by  
478 variant of concern when the Gamma, Delta, or Omicron variant were dominant within the  
479 sample, and carried out an exploratory subgroup analysis using these categories. This analysis  
480 is exploratory. A treatment by time interaction was used to look for differential changes in viral  
481 load from baseline between the groups accounting for variants. Ct values were converted to  
482 copies/ml using a standard curve obtained from the same machine, and analysis were carried  
483 out on log<sub>10</sub> (copies/mL). Days since randomization was entered as a factor, with Day 0 as the  
484 reference category. We categorized baseline load, *a priori*, as high (the 15% of patients with  
485 the highest baseline load) or low as a three-way interaction with treatment and days since  
486 randomization. In addition, to account for additional variance, we included age, sex, days since  
487 onset of symptoms and vaccination status at randomization, and whether Omicron B.11529  
488 was the dominant variant at the time of randomization. For tests where the N2 target was not  
489 detected, they were assigned a viral load of 0 for calculation purposes.

490

491 Figures S1-3 are purely descriptive and did not inform formal statistical inference.

492

493

494 **Description of Virological Assays**

495 SARS-CoV-2 quantification was performed at the central laboratory of Precision Medicine  
 496 Labs (Belo Horizonte, MG, Brazil) using the quantitative real-time PCR CDC protocol for  
 497 the N gene with N1 and N2 primers.<sup>5</sup> RNaseP was run on all samples to confirm sample  
 498 integrity. Samples negative for RNaseP with undetectable SARS-CoV-2 RNA were counted  
 499 as missing for all analyses. To convert cycle threshold (Ct) values to quantitative values, a  
 500 standard curve was generated using a plasmid-derived cDNA standard. The limit of detection  
 501 was determined to be 10 copies/ $\mu$ L for the N2 primer. Samples below the limit of detection  
 502 were counted as undetectable. Samples from the Canadian cohort were quantified similarly  
 503 using a protocol for the E gene<sup>6</sup> as well as the CDC protocol for N gene.<sup>5</sup>

504  
 505  
 506 Determination of SARS-CoV-2 variant was performed using exclusion PCR for mutational  
 507 analysis according to the table below.  
 508

| Variant                   | N501Y | E484K | K417T | K417N | L452R | E484Q | P681R | G339D |
|---------------------------|-------|-------|-------|-------|-------|-------|-------|-------|
| Alpha (B.1.1.7)           |       |       |       |       |       |       |       |       |
| Beta (B.1.351)            |       |       |       |       |       |       |       |       |
| Delta (B.1.617.2)         |       |       |       |       |       |       |       |       |
| Delta não VOC (B.1.617.1) |       |       |       |       |       |       |       |       |
| Omicron (B.1.1.529)       |       |       |       |       |       |       |       |       |
| Zeta (P.2)                |       |       |       |       |       |       |       |       |
| Gamma (P.1)               |       |       |       |       |       |       |       |       |
| Mu (B.1.621)              |       |       |       |       |       |       |       |       |

509  
 510  
 511  
 512  
 513  
 514  
 515  
 516  
 517  
 518

519 **Viral kinetics Days 0-14 among patients in the Canadian cohort**  
520 Virological data are shown for the subset of participants (n=30) who did daily self-collected  
521 swabs for 14 days after treatment.  
522

523 **Figure S1: Mean SARS-CoV-2 viral load and viral load decline**

524  
525 **a) Mean SARS-CoV-2 viral load and b) Mean decline in SARS-CoV-2 viral load in log**  
526 **copies/mL from baseline through Day 14 post-injection are shown for the peginterferon**  
527 **lambda and placebo groups. Error bars represent standard error of the mean.**  
528

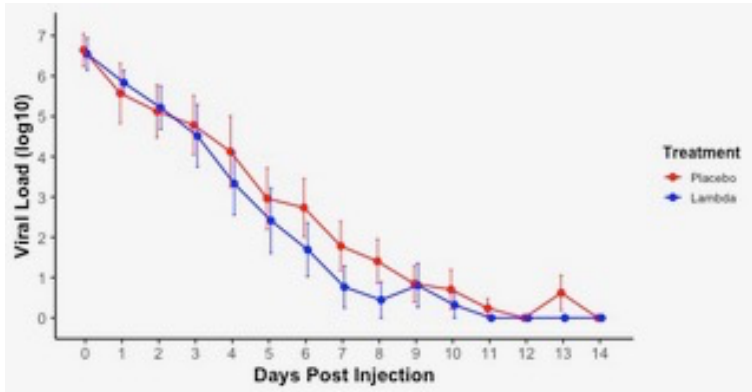

529

530 **b.**

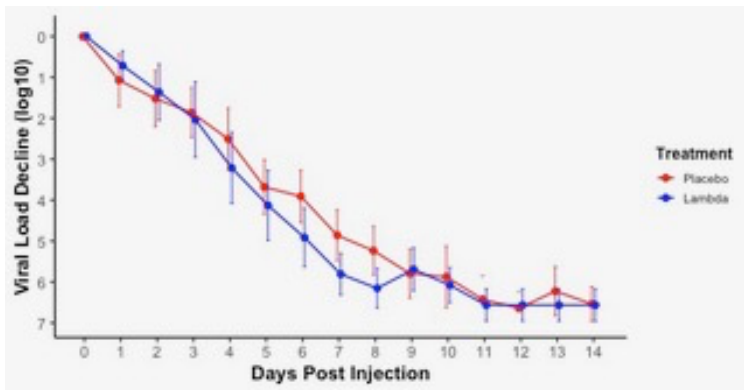

531

532

533

534

535

536

537

538

539

540

541

542

543

544



545 **Figure S2: Proportion of patients negative for SARS-CoV-2 RNA per day after the injection**

546 The proportion of participants who had a negative swab for SARS-CoV-2 RNA at each day  
547 post injection is shown for the peginterferon lambda (blue) and placebo (red) groups. After  
548 controlling for baseline viral load, the odds of clearance at Day 7 were higher in the  
549 peginterferon lambda than placebo group (OR 9.35, 95% CI 1.42-103.61).  
550  
551

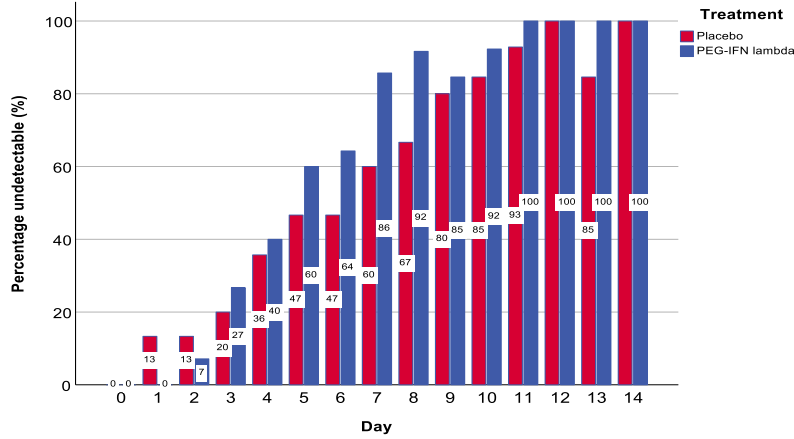

552  
553

554

555

556

557

558

559

560

561

562

563

564

565

566

567

568

569

570 **Figure S3: Proportion of patients negative for SARS-CoV-2 RNA per day after injection and**  
571 **probability of testing negative by Day 7 based on baseline SARS-CoV-2 viral kinetics.**

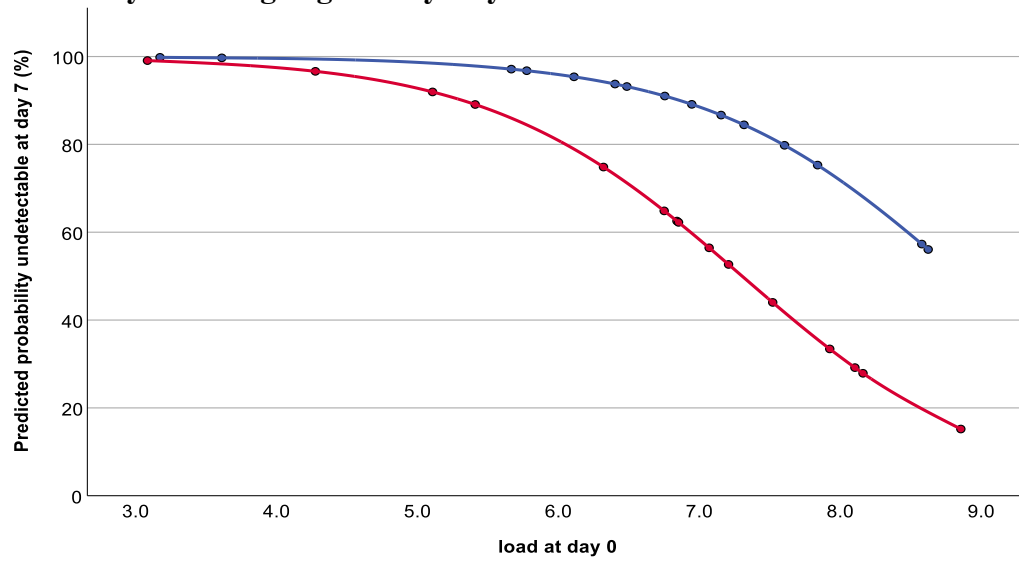

572

573

574 **Figure S4: Relative risk of being hospitalized or in observance in an emergency room for at**  
 575 **least 6 hours for peginterferon lambda versus placebo (early onset [0-3 days] subgroup)**  
 576

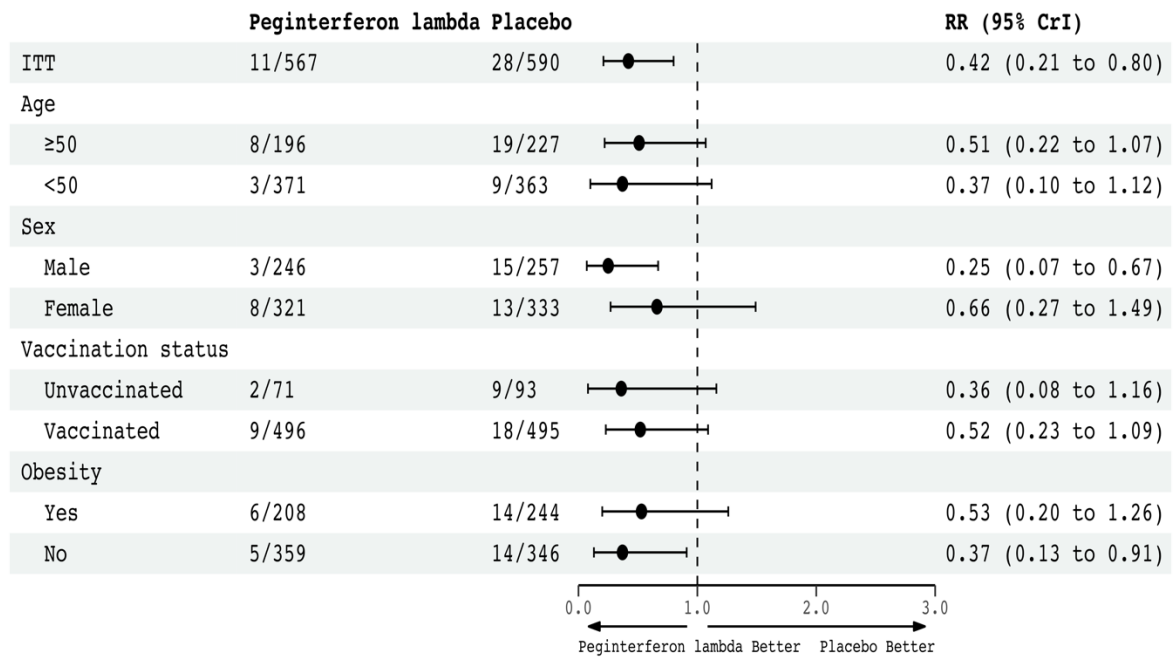

577  
 578  
 579  
 580

581 **Figure S5. Change in viral load from baseline, days 3 and 7.**  
582

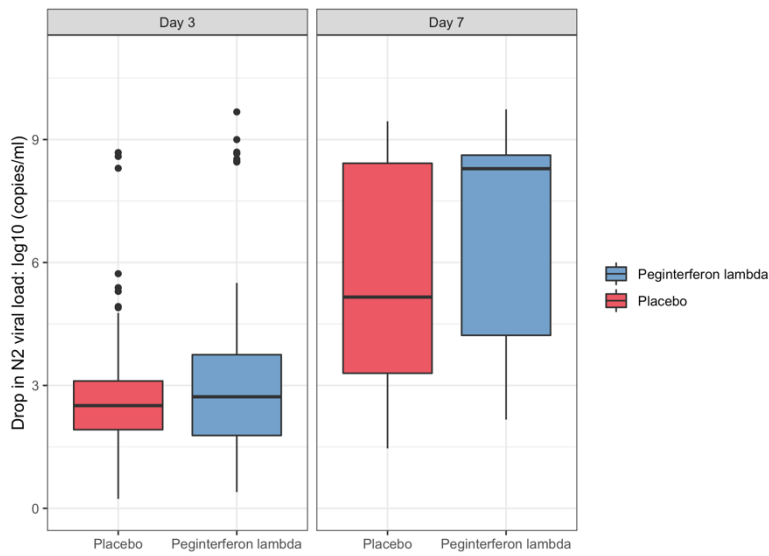

596

597  
598 Legend: Box plot shows median, inter-quartile range, minimum and maximum, and outliers  
599 more than 1.5\*inter-quartile range.  
600  
601

602 **Table S1: Primary and secondary outcomes for peginterferon lambda versus placebo (ITT population)**

|                                                       | Measure       | Peginterferon<br>lambda* | Placebo*    | Estimated<br>treatment effect |
|-------------------------------------------------------|---------------|--------------------------|-------------|-------------------------------|
|                                                       |               | (n=916)                  | (n=1003)    |                               |
| Hospitalization or ER > 6h for COVID-19               | RR (95% CrI)  | 25 (2.7%)                | 57 (5.7%)   | 0.49 (0.30, 0.76)             |
| Hospitalization or ER (any duration) for COVID-19     | RR (95% CrI)  | 99 (10.8%)               | 140 (14%)   | 0.78 (0.61, 0.99)             |
| Death due to COVID-19                                 | RR (95% CrI)  | 1 (0.1%)                 | 4 (0.4%)    | 0.40 (0.05, 1.95)             |
| Death or hospitalization due to COVID-19              | RR (95% CrI)  | 22 (2.4%)                | 40 (4%)     | 0.61 (0.36, 0.99)             |
| All cause death or hospitalization due to COVID-19    | RR (95% CrI)  | 24 (2.6%)                | 40 (4%)     | 0.66 (0.40, 1.07)             |
| All cause ER visit, hospitalization, or death         | RR (95% CrI)  | 124 (13.5%)              | 151 (15.1%) | 0.90 (0.72, 1.12)             |
| All cause ER visit >6h, hospitalization, or death     | RR (95% CrI)  | 34 (3.7%)                | 59 (5.9%)   | 0.64 (0.42, 0.95)             |
| Mechanical ventilation                                | RR (95% CrI)  | 4 (0.4%)                 | 7 (0.7%)    | 0.66 (0.20, 2.03)             |
| Days on mechanical ventilation                        | IRR (95% CrI) |                          |             | -4.47 (-6.89, 3.09)           |
| Days of hospitalization                               | IRR (95% CrI) |                          |             | -1.02 (-3.86, 1.37)           |
| Days to hospitalization for COVID-19                  | HR (95% CrI)  |                          |             | 0.57 (0.33, 0.95)             |
| Days to hospitalization or ER visit > 6h for COVID-19 | HR (95% CrI)  |                          |             | 0.47 (0.29, 0.73)             |
| Days to death for COVID-19                            | HR (95% CrI)  |                          |             | 0.22 (0.01, 1.64)             |
| Days to hospitalization or death for COVID-19         | HR (95% CrI)  |                          |             | 0.59 (0.35, 0.97)             |
| Days to recovery                                      | HR (95% CrI)  |                          |             | 0.94 (0.85, 1.05)             |

\*For categorical outcomes, totals and percentages are shown. For time-to-event outcomes, medians and 95% CIs are shown. For continuous outcomes, medians and ranges are shown. CI, confidence interval; CrI, credible confidence interval; HR, hazard ratio; RR, relative risk; TEAE, treatment emergent adverse events.

603  
604

605 **Table S2: Primary and secondary outcomes for peginterferon lambda versus placebo (Treated within 3 days of symptom onset population)**

|                                                       | Measure      | Peginterferon<br>lambda* | Placebo*   | Estimated<br>treatment effect |
|-------------------------------------------------------|--------------|--------------------------|------------|-------------------------------|
|                                                       |              | (n=567)                  | (n=590)    |                               |
| Hospitalization or ER > 6h for COVID-19               | RR (95% CrI) | 11 (1.9%)                | 28 (4.7%)  | 0.42 (0.21, 0.80)             |
| Hospitalization for COVID-19                          | RR (95% CrI) | 8 (1.4%)                 | 23 (3.9%)  | 0.38 (0.17, 0.79)             |
| Hospitalization or ER (any duration) for COVID-19     | RR (95% CrI) | 54 (9.5%)                | 79 (13.4%) | 0.71 (0.51, 0.98)             |
| Death due to COVID-19                                 | RR (95% CrI) | 0 (0%)                   | 3 (0.5%)   | 0.19 (0.01, 1.57)             |
| Death or hospitalization due to COVID-19              | RR (95% CrI) | 8 (1.4%)                 | 23 (3.9%)  | 0.38 (0.17, 0.79)             |
| All cause death or hospitalization due to COVID-19    | RR (95% CrI) | 9 (1.6%)                 | 23 (3.9%)  | 0.42 (0.19, 0.86)             |
| All cause ER visit, hospitalization, or death         | RR (95% CrI) | 69 (12.2%)               | 86 (14.6%) | 0.84 (0.62, 1.12)             |
| All cause ER visit > 6h, hospitalization, or death    | RR (95% CrI) | 14 (2.5%)                | 28 (4.7%)  | 0.53 (0.28, 0.97)             |
| Mechanical ventilation                                | RR (95% CrI) | 2 (0.4%)                 | 4 (0.7%)   | 0.59 (0.12, 2.49)             |
| Days on mechanical ventilation                        | MD (95% CrI) |                          |            | -3.09 (-6.83, 5.73)           |
| Days of hospitalization                               | MD (95% CrI) |                          |            | -0.18 (-4.07, 2.82)           |
| Days to hospitalization for COVID-19                  | HR (95% CrI) |                          |            | 0.35 (0.15, 0.75)             |
| Days to hospitalization or ER visit > 6h for COVID-19 | HR (95% CrI) |                          |            | 0.40 (0.20, 0.79)             |
| Days to death for COVID-19                            | HR (95% CrI) |                          |            | 0.00 (0.00, 0.55)             |
| Days to hospitalization or death for COVID-19         | HR (95% CrI) |                          |            | 0.35 (0.15, 0.75)             |
| Days to recovery                                      | HR (95% CrI) |                          |            | 1.01 (0.89, 1.14)             |

\*For categorical outcomes, totals and percentages are shown. For time-to-event outcomes, medians and 95% CIs are shown. CI, confidence interval; CrI, credible confidence interval; HR, hazard ratio; MD, mean difference; RR, risk ratio. These analyses were exploratory and have not been corrected for multiplicity.

606  
607  
608

609 **Table S3: Primary and secondary outcomes for peginterferon lambda versus placebo (Modified intention to treat population)**

|                                                       | Measure      | Peginterferon<br>lambda* | Placebo*    | Estimated<br>treatment effect |
|-------------------------------------------------------|--------------|--------------------------|-------------|-------------------------------|
|                                                       |              | (n=929)                  | (n=1016)    |                               |
| Hospitalization or ER > 6h for COVID-19               | RR (95% CI)  | 23 (2.5%)                | 55 (5.4%)   | 0.47 (0.29, 0.73)             |
| Hospitalization for COVID-19                          | RR (95% CrI) | 19 (2%)                  | 38 (3.7%)   | 0.56 (0.32, 0.93)             |
| Hospitalization or ER (any duration) for COVID-19     | RR (95% CrI) | 97 (10.4%)               | 138 (13.6%) | 0.77 (0.60, 0.98)             |
| Death due to COVID-19                                 | RR (95% CrI) | 1 (0.1%)                 | 4 (0.4%)    | 0.39 (0.05, 1.91)             |
| Death or hospitalization due to COVID-19              | RR (95% CrI) | 20 (2.2%)                | 38 (3.7%)   | 0.59 (0.34, 0.98)             |
| All cause death or hospitalization due to COVID-19    | RR (95% CrI) | 22 (2.4%)                | 38 (3.7%)   | 0.64 (0.38, 1.05)             |
| All cause ER visit, hospitalization, or death         | RR (95% CrI) | 122 (13.1%)              | 149 (14.7%) | 0.90 (0.72, 1.11)             |
| All cause ER visit > 6h, hospitalization, or death    | RR (95% CrI) | 32 (3.4%)                | 57 (5.6%)   | 0.62 (0.41, 0.93)             |
| Mechanical ventilation                                | RR (95% CrI) | 4 (0.4%)                 | 7 (0.7%)    | 0.67 (0.20, 2.02)             |
| Days on mechanical ventilation                        | MD (95% CrI) |                          |             | -4.47 (-6.89, 3.09)           |
| Days of hospitalization                               | MD (95% CrI) |                          |             | -1.10 (-4.14, 1.49)           |
| Days to hospitalization for COVID-19                  | HR (95% CrI) |                          |             | 0.53 (0.30, 0.93)             |
| Days to hospitalization or ER visit > 6h for COVID-19 | HR (95% CrI) |                          |             | 0.45 (0.27, 0.72)             |
| Days to death for COVID-19                            | HR (95% CrI) |                          |             | 0.20 (0.01, 1.83)             |
| Days to hospitalization or death for COVID-19         | HR (95% CrI) |                          |             | 0.56 (0.33, 0.95)             |
| Days to recovery                                      | HR (95% CrI) |                          |             | 0.94 (0.85, 1.05)             |

\*For categorical outcomes, totals and percentages are shown. For time-to-event outcomes, medians and 95% CIs are shown. CI, confidence interval; CrI, credible confidence interval; HR, hazard ratio; MD, mean difference; RR, risk ratio.

610  
611  
612  
613

614 **Table S4: Primary and secondary outcomes for Peginterferon lambda versus placebo (Matched placebo population)**

|                                                       | Measure      | Peginterferon<br>lambda* | Placebo*    | Estimated<br>treatment effect |
|-------------------------------------------------------|--------------|--------------------------|-------------|-------------------------------|
|                                                       |              | (n=931)                  | (n=825)     |                               |
| Hospitalization or ER > 6h for COVID-19               | RR (95% CI)  | 25 (2.7%)                | 43 (5.2%)   | 0.52 (0.32, 0.84)             |
| Hospitalization for COVID-19                          | RR (95% CrI) | 21 (2.3%)                | 29 (3.5%)   | 0.65 (0.37, 1.11)             |
| Hospitalization or ER (any duration) for COVID-19     | RR (95% CrI) | 99 (10.6%)               | 109 (13.2%) | 0.81 (0.62, 1.04)             |
| Death due to COVID-19                                 | RR (95% CrI) | 1 (0.1%)                 | 3 (0.4%)    | 0.40 (0.05, 2.23)             |
| Death or hospitalization due to COVID-19              | RR (95% CrI) | 22 (2.4%)                | 29 (3.5%)   | 0.68 (0.39, 1.16)             |
| All cause death or hospitalization due to COVID-19    | RR (95% CrI) | 24 (2.6%)                | 29 (3.5%)   | 0.74 (0.43, 1.24)             |
| All cause ER visit, hospitalization, or death         | RR (95% CrI) | 124 (13.3%)              | 117 (14.2%) | 0.94 (0.74, 1.19)             |
| All cause ER visit > 6h, hospitalization, or death    | RR (95% CrI) | 34 (3.7%)                | 43 (5.2%)   | 0.70 (0.45, 1.08)             |
| Mechanical ventilation                                | RR (95% CrI) | 4 (0.4%)                 | 5 (0.6%)    | 0.73 (0.21, 2.48)             |
| Days on mechanical ventilation                        | MD (95% CrI) |                          |             | -4.05 (-6.87, 4.27)           |
| Days of hospitalization                               | MD (95% CrI) |                          |             | -0.85 (-3.97, 1.98)           |
| Days to hospitalization for COVID-19                  | HR (95% CrI) |                          |             | 0.63 (0.35, 1.11)             |
| Days to hospitalization or ER visit > 6h for COVID-19 | HR (95% CrI) |                          |             | 0.51 (0.31, 0.85)             |
| Days to death for COVID-19                            | HR (95% CrI) |                          |             | 0.25 (0.01, 2.18)             |
| Days to hospitalization or death for COVID-19         | HR (95% CrI) |                          |             | 0.66 (0.38, 1.17)             |
| Days to recovery                                      | HR (95% CrI) |                          |             | 0.95 (0.85, 1.06)             |

\*For categorical outcomes, totals and percentages are shown. For time-to-event outcomes, medians and 95% CIs are shown. CI, confidence interval; CrI, credible confidence interval; HR, hazard ratio; MD, mean difference; RR, risk ratio.

615  
616  
617



618  
619  
620  
621

**Table S5: Summary of 10 most frequent adverse events**

|                        | # Events (% of total events) |           |            |
|------------------------|------------------------------|-----------|------------|
|                        | Peginterferon<br>lambda      | Placebo   | Overall    |
| COVID-19               | 67 (39.4)                    | 85 (40.1) | 152 (39.8) |
| COVID-19 pneumonia     | 24 (14.1)                    | 40 (18.9) | 64 (16.8)  |
| Dyspnoea               | 8 (4.7)                      | 8 (3.8)   | 16 (4.2)   |
| Influenza like illness | 5 (2.9)                      | 7 (3.3)   | 12 (3.1)   |
| Cough                  | 4 (2.4)                      | 6 (2.8)   | 10 (2.6)   |
| Fatigue                | 1 (0.6)                      | 5 (2.4)   | 6 (1.6)    |
| Headache               | 4 (2.4)                      | 2 (0.9)   | 6 (1.6)    |
| Vertigo                | 2 (1.2)                      | 4 (1.9)   | 6 (1.6)    |
| Chest pain             | 1 (0.6)                      | 4 (1.9)   | 5 (1.3)    |
| Back pain              | 3 (1.8)                      | 1 (0.5)   | 4 (1.0)    |

Percent refers to total adverse events, not total patients.

622

623 **Table S6: Mortality due to any cause**

| Randomization date | Treatment            | Death date | Pulmonary death | Cardiac death | COVID death | Death due to other reason               | Days to death |
|--------------------|----------------------|------------|-----------------|---------------|-------------|-----------------------------------------|---------------|
| 2021-09-16         | Peginterferon lambda | 2021-10-02 |                 |               |             | Status Epilepticus                      | 16            |
| 2021-09-20         | Peginterferon lambda | 2021-09-26 |                 | Yes           | Yes         |                                         | 6             |
| 2021-09-15         | Placebo              | 2021-10-23 | Yes             |               | Yes         |                                         | 38            |
| 2021-09-28         | Placebo              | 2021-10-22 | Yes             |               | Yes         |                                         | 24            |
| 2021-06-24         | Placebo              | 2021-07-02 | Yes             |               | Yes         |                                         | 8             |
| 2021-09-07         | Peginterferon lambda | 2021-10-15 | Yes             |               | Yes         |                                         | 38            |
| 2021-09-13         | Peginterferon lambda | 2021-10-03 |                 |               |             | Closed Head Trauma, Respiratory failure | 20            |
| 2021-10-11         | Placebo              | 2021-10-20 | Yes             |               | Yes         |                                         | 9             |
| 2021-10-05         | Placebo              | 2021-10-19 | Yes             |               | Yes         |                                         | 14            |
| 2022-01-11         | Placebo              | 2022-02-28 |                 |               | Yes         | acute myeloid leukemia                  | 48            |

624  
625  
626

**Table S7: Representativeness of Study Participants**

| <b>Category</b>                                | <b>Example</b>                                                                                                                                                                                                                                                                                                                                                                                                                                                                                            |
|------------------------------------------------|-----------------------------------------------------------------------------------------------------------------------------------------------------------------------------------------------------------------------------------------------------------------------------------------------------------------------------------------------------------------------------------------------------------------------------------------------------------------------------------------------------------|
| <b>Disease under investigation</b>             | COVID-19                                                                                                                                                                                                                                                                                                                                                                                                                                                                                                  |
| <b>Special considerations related to</b>       |                                                                                                                                                                                                                                                                                                                                                                                                                                                                                                           |
| <b>Age</b>                                     | Age is one of the key factors, if not the most significant risk factors for severe disease. Infection rates and deaths increase with age, as 62% of infections are in people > 50 years, and 95% of deaths from COVID-19 are for those > 50 years <sup>7,8</sup>                                                                                                                                                                                                                                          |
| <b>Sex</b>                                     | COVID-19 affects men more than women, with men at higher risk than women to develop severe disease. The fatality rate is also increased in men compared to women. A review shows that men are 50% more men requiring hospitalization than women, and the ICU admission is between 3-4 times higher for men. <sup>9</sup>                                                                                                                                                                                  |
| <b>Race</b>                                    | COVID-19 affects different races disproportionately, however this is thought to be due to factors such health care access and exposure risk. Most studies investigating these differences were based in the United States. Compared with white Americans, African Americans were 1.5-3 times more likely to be hospitalized, 3.6 times higher risk of mortality, and Hispanics were 3.2 times higher risk of mortality. These differences are thought to be caused by socioeconomic factors. <sup>7</sup> |
| <b>Pre-existing conditions</b>                 | Pre-existing conditions is another key risk factor for COVID-19. According to COVID-NET, 89% of hospitalized patients had a pre-existing condition, most commonly hypertension (49.7%), obesity (48.3%), chronic lung disease (34.6%), diabetes mellitus (28.3%) and cardiovascular disease (27.8%). <sup>8</sup>                                                                                                                                                                                         |
| <b>Other considerations</b>                    | Most of the data gathered on the different effects of COVID-19 on different groups were gathered from the US, China and Europe, as data was lacking for Brazil. Some of these aspects, especially the differences in race, will not translate directly to Brazil as many of findings were related to socioeconomic differences in the US.                                                                                                                                                                 |
| <b>Overall representativeness of the trial</b> | Participants were asked their age, sex, race and pre-existing conditions during the screening visit. The participants in the trial were split between 41.8% male to 58.2% female. The proportion of race was 95.2% mixed race, 0.9% black/African American, and 2.9% unknown. Our age                                                                                                                                                                                                                     |

distribution was also evenly split, with 53.8% of participants < 50 years, while 46.2% were ≥ 50 years. The study had a higher representation of females and those < 50 years, which represented the course of the pandemic at that time. The distribution of females and males was split evenly between the peginterferon lambda arm and placebo.

629 A search of Pubmed was done to determine how COVID-19 affects people of different ages,  
630 sex, race and pre-existing conditions.

631  
632

633 **Table S8: Adverse events by grade, MEDRA type and treatment group**

634  
635

|                                                      | # Events (%)           |                       |                  |                        |                       |                  |
|------------------------------------------------------|------------------------|-----------------------|------------------|------------------------|-----------------------|------------------|
|                                                      | Peginterferon lambda   |                       |                  | Placebo                |                       |                  |
|                                                      | Grade 1 / 2<br>n = 135 | Grade 3 / 4<br>n = 31 | Grade 5<br>n = 4 | Grade 1 / 2<br>n = 154 | Grade 3 / 4<br>n = 52 | Grade 5<br>n = 6 |
| Cardiac disorders                                    | 1 (0.7)                | 1 (3.2)               | 1 (25.0)         | 2 (1.3)                | 0 (0)                 | 0 (0)            |
| Ear and labyrinth disorders                          | 2 (1.5)                | 0 (0)                 | 0 (0)            | 5 (3.2)                | 0 (0)                 | 0 (0)            |
| Eye disorders                                        | 0 (0)                  | 0 (0)                 | 0 (0)            | 2 (1.3)                | 0 (0)                 | 0 (0)            |
| Gastrointestinal disorders                           | 8 (5.9)                | 1 (3.2)               | 0 (0)            | 5 (3.2)                | 0 (0)                 | 0 (0)            |
| General disorders and administration site conditions | 9 (6.7)                | 0 (0)                 | 0 (0)            | 18 (11.7)              | 0 (0)                 | 0 (0)            |
| Hepatobiliary disorders                              | 1 (0.7)                | 2 (6.5)               | 0 (0)            | 0 (0)                  | 0 (0)                 | 0 (0)            |
| Immune system disorders                              | 1 (0.7)                | 0 (0)                 | 0 (0)            | 1 (0.6)                | 0 (0)                 | 0 (0)            |
| Infections and infestations                          | 73 (54.1)              | 23 (74.2)             | 1 (25.0)         | 80 (51.9)              | 46 (88.5)             | 6 (100)          |
| Injury, poisoning and procedural complications       | 0 (0)                  | 0 (0)                 | 1 (25.0)         | 1 (0.6)                | 1 (1.9)               | 0 (0)            |
| Investigations                                       | 5 (3.7)                | 0 (0)                 | 0 (0)            | 2 (1.3)                | 0 (0)                 | 0 (0)            |
| Metabolism and nutrition disorders                   | 0 (0)                  | 0 (0)                 | 0 (0)            | 4 (2.6)                | 0 (0)                 | 0 (0)            |
| Musculoskeletal and connective tissue disorders      | 5 (3.7)                | 0 (0)                 | 0 (0)            | 3 (1.9)                | 0 (0)                 | 0 (0)            |
| Nervous system disorders                             | 8 (5.9)                | 1 (3.2)               | 1 (25.0)         | 5 (3.2)                | 1 (1.9)               | 0 (0)            |
| Psychiatric disorders                                | 3 (2.2)                | 1 (3.2)               | 0 (0)            | 3 (1.9)                | 1 (1.9)               | 0 (0)            |
| Renal and urinary disorders                          | 0 (0)                  | 0 (0)                 | 0 (0)            | 0 (0)                  | 1 (1.9)               | 0 (0)            |
| Respiratory, thoracic and mediastinal disorders      | 12 (8.9)               | 1 (3.2)               | 0 (0)            | 16 (10.4)              | 1 (1.9)               | 0 (0)            |
| Skin and subcutaneous tissue disorders               | 4 (3.0)                | 0 (0)                 | 0 (0)            | 3 (1.9)                | 0 (0)                 | 0 (0)            |
| Surgical and medical procedures                      | 0 (0)                  | 1 (3.2)               | 0 (0)            | 0 (0)                  | 0 (0)                 | 0 (0)            |
| Vascular disorders                                   | 3 (2.2)                | 0 (0)                 | 0 (0)            | 4 (2.6)                | 1 (1.9)               | 0 (0)            |

636  
637 Number of adverse events categorized by MedDRA SOC term. Includes data from both  
638 Brazil and Toronto.

639  
640

641 **Table S9: Primary outcome results by site**  
 642

| SITENUM | Peginterferon lambda | Placebo |
|---------|----------------------|---------|
| 1       | 2.05%                | 6.21%   |
| 2       | 2.86%                | 3.57%   |
| 3       | 0%                   | 2.13%   |
| 4       | 0%                   | 9.52%   |
| 5       | 4.88%                | 0%      |
| 6       | 1.72%                | 4.62%   |
| 7       | 5.22%                | 8%      |
| 8       | 5.05%                | 6.84%   |
| 9       | 2%                   | 5.84%   |
| 10      | 0%                   | 5.88%   |
| 11      | 2.70%                | 7.14%   |
| 12      | 0%                   | 0%      |
| 13      | 0%                   | 0%      |
| 14      | 0%                   | 0%      |

643  
 644 **The proportion of patients experiencing the primary outcome at each participating site**  
 645 **Site 14 refers to patients recruited in Canada, the rest of the sites are within Brazil.**

646  
647

**Table S10. Frequentist ITT analysis**

| Outcome                                               | Measure      | Peginterferon<br>lambda*<br>(N=931) | Placebo*<br>(N=1018) | Estimated treatment<br>effect | Probability of<br>Superiority |
|-------------------------------------------------------|--------------|-------------------------------------|----------------------|-------------------------------|-------------------------------|
| Hospitalization or ER visit > 6h for COVID-19         | RR (95% CrI) | 25 (2.7%)                           | 57 (5.6%)            | 0.48 (0.30, 0.76)             | .002                          |
| Days to hospitalization or ER visit > 6h for COVID-19 | HR (95% CrI) | --                                  | --                   | 0.47 (0.30, 0.76)             | .001                          |
| Hospitalization for COVID-19                          | RR (95% CrI) | 21 (2.3%)                           | 40 (3.9%)            | 0.57 (0.34, 0.97)             |                               |
| Days to hospitalization for COVID-19                  | HR (95% CrI) | --                                  | --                   | 0.57 (0.34, 0.97)             |                               |
| Death or hospitalization due to COVID-19              | RR (95% CrI) | 22 (2.4%)                           | 40 (3.9%)            | 0.60 (0.36, 0.99)             |                               |
| Days to death or hospitalization due to COVID-19      | HR (95% CrI) | --                                  | --                   | 0.60 (0.35, 0.99)             |                               |
| Death due to COVID-19                                 | RR (95% CrI) | 1 (0.1%)                            | 4 (0.4%)             | 0.27 (0.03, 2.44)             |                               |
| Days to death for COVID-19                            | HR (95% CI)  | --                                  | --                   | 0.27 (0.03, 2.44)             |                               |
| Hospitalization or ER (any duration) for COVID-19     | RR (95% CrI) | 99 (10.6%)                          | 140 (13.8%)          | 0.77 (0.61, 0.98)             |                               |
| Days on mechanical ventilation                        | MD (95% CrI) | 10.2 (7.4)                          | 13.6 (11.9)          | -3.32 (-16.33, 9.69)          |                               |

LEGEND:\*For categorical outcomes, totals and percentages are presented; for time-to-event outcomes, medians and 95% Bayesian credible intervals are presented; for continuous variables, means and standard deviation are presented. CrI, credible interval; HR: hazard ratio; RR: risk ratio; MD: Mean difference, --: Median not reached; TEAE, Treatment emergent adverse events

648  
649

650 **Table S11. Demographics of COVID-19 Cases in the US**  
 651

|                                    | <b>Subgroups</b>    | <b>Percentage of COVID cases</b> | <b>Percentage of the US population</b> |
|------------------------------------|---------------------|----------------------------------|----------------------------------------|
| <b>Race/Ethnicity</b> <sup>†</sup> | Asian, non-hispanic | 4.3%                             | 5.76%                                  |
|                                    | Black, non-hispanic | 12.4%                            | 12.54%                                 |
|                                    | Hispanic/Latino     | 24.6%                            | 18.45%                                 |
|                                    | White, Non-hispanic | 53.4%                            | 60.11%                                 |
| <b>Age, years</b>                  | 0-17                | 17.4%                            | 22.3%                                  |
|                                    | 18-39               | 37.6%                            | 29.9%                                  |
|                                    | 40-64               | 32.7%                            | 31.5%                                  |
|                                    | 65-84               | 10.7%                            | 14.5%                                  |
|                                    | 85+                 | 1.7%                             | 2%                                     |
| <b>Sex</b>                         | Male                | 46.4%                            | 49.25%                                 |
|                                    | Female              | 53.6%                            | 50.75%                                 |

652  
 653  
 654  
 655  
 656  
 657  
 658  
 659  
 660  
 661  
 662  
 663  
 664  
 665  
 666  
 667  
 668  
 669  
 670  
 671  
 672

\*Numbers retrieved from the CDC on September 12, 2022; †: based on 65% of total cases

Source: <https://covid.cdc.gov/covid-data-tracker/#demographics>

673  
674  
675

**Listing 1: Deaths, serious treatment emergent adverse events and other significant events**

| Treatment            | System Organ Class / Preferred term / Verbatim Term                                                 | Start Date / End Date   | Severity / Relationship to IP | Outcome / Study Drug Action Taken       | Serious? | IME/CA/DE/HO/LT ? |
|----------------------|-----------------------------------------------------------------------------------------------------|-------------------------|-------------------------------|-----------------------------------------|----------|-------------------|
| Peginterferon lambda | Infections and infestations/COVID-19 pneumonia/COVID-19 pneumonia                                   | 2021-08-04 / 2021-08-08 | Grade 3 / Not Related         | Recovered / Resolved / Not Applicable   | Yes      | No/No/No/Yes/No   |
| Peginterferon lambda | Cardiac disorders/Atrioventricular block second degree/Type II second degree atrioventricular block | 2022-02-03 / 2022-02-16 | Grade 3 / Not Related         | Recovered / Resolved / Not Applicable   | Yes      | No/No/No/Yes/No   |
| Peginterferon lambda | Infections and infestations/COVID-19 pneumonia/COVID-19 pneumonia                                   | 2021-07-15 / 2021-07-19 | Grade 3 / Not Related         | Recovered / Resolved / Not Applicable   | Yes      | No/No/No/Yes/No   |
| Peginterferon lambda | Infections and infestations/COVID-19 pneumonia/COVID-19 pneumonia                                   | 2021-07-20 / 2021-07-23 | Grade 3 / Not Related         | Recovered / Resolved / Not Applicable   | Yes      | No/No/No/Yes/No   |
| Peginterferon lambda | Infections and infestations/COVID-19 pneumonia/COVID-19 pneumonia                                   | 2021-07-23 / 2021-07-27 | Grade 3 / Not Related         | Recovered / Resolved / Not Applicable   | Yes      | No/No/No/Yes/No   |
| Peginterferon lambda | Infections and infestations/COVID-19 pneumonia/COVID-19 pneumonia                                   | 2021-07-22 / 2021-07-29 | Grade 3 / Not Related         | Recovered / Resolved / Not Applicable   | Yes      | No/No/No/Yes/No   |
| Peginterferon lambda | Infections and infestations/COVID-19 pneumonia/COVID-19 pneumonia                                   | 2021-08-28 / 2021-08-31 | Grade 3 / Not Related         | Recovered / Resolved / Not Applicable   | Yes      | No/No/No/Yes/No   |
| Peginterferon lambda | Infections and infestations/COVID-19/COVID-19                                                       | 2021-09-10 / 2021-09-10 | Grade 3 / Not Related         | Recovered / Resolved / Dose Not Changed | Yes      | No/No/No/Yes/No   |
| Peginterferon lambda | Surgical and medical procedures/Meniscus operation/Meniscus operation                               | 2021-11-11 / 2021-11-12 | Grade 3 / Not Related         | Recovered / Resolved / Not Applicable   | Yes      | No/No/No/Yes/No   |
| Peginterferon lambda | Infections and infestations/COVID-19/COVID-19                                                       | 2021-08-02 / 2021-08-02 | Grade 3 / Not Related         | Recovered / Resolved / Not Applicable   | Yes      | No/No/No/No/No    |



| Treatment            | System Organ Class / Preferred term / Verbatim Term                | Start Date / End Date   | Severity / Relationship to IP | Outcome / Study Drug Action Taken       | Serious? | IME/CA/DE/HO/LT ? |
|----------------------|--------------------------------------------------------------------|-------------------------|-------------------------------|-----------------------------------------|----------|-------------------|
| Peginterferon lambda | Infections and infestations/COVID-19 pneumonia/COVID-19 pneumonia  | 2021-09-18 / 2021-09-22 | Grade 3 / Not Related         | Recovered / Resolved / Not Applicable   | Yes      | No/No/No/Yes/No   |
| Peginterferon lambda | Infections and infestations/COVID-19 pneumonia/COVID-19 pneumonia  | 2021-07-24 / 2021-07-30 | Grade 3 / Not Related         | Recovered / Resolved / Not Applicable   | Yes      | No/No/No/Yes/No   |
| Peginterferon lambda | Infections and infestations/COVID-19 pneumonia/COVID-19 pneumonia  | 2021-08-04 / 2021-08-07 | Grade 3 / Not Related         | Recovered / Resolved / Not Applicable   | Yes      | No/No/No/Yes/No   |
| Peginterferon lambda | Infections and infestations/COVID-19 pneumonia/COVID-19 pneumonia  | 2021-10-27 / 2021-10-31 | Grade 3 / Not Related         | Recovered / Resolved / Drug Interrupted | Yes      | No/No/No/Yes/No   |
| Peginterferon lambda | Infections and infestations/COVID-19 pneumonia/COVID-19 pneumonia  | 2021-11-10 / 2021-11-16 | Grade 3 / Not Related         | Recovered / Resolved / Not Applicable   | Yes      | No/No/No/Yes/No   |
| Peginterferon lambda | Psychiatric disorders/Somatic symptom disorder/Somatoform disorder | 2021-12-17 / 2021-12-18 | Grade 3 / Not Related         | Recovered / Resolved / Not Applicable   | Yes      | Yes/No/No/No/No   |
| Peginterferon lambda | Nervous system disorders/Syncope/Syncope                           | 2022-01-03 / 2022-01-03 | Grade 3 / Not Related         | Recovered / Resolved / Not Applicable   | Yes      | Yes/No/No/No/No   |
| Peginterferon lambda | Respiratory, thoracic and mediastinal disorders/Cough/Cough        | 2021-11-25 / 2021-11-26 | Grade 3 / Not Related         | Recovered / Resolved / Not Applicable   | No       | NA/NA/NA/NA/NA    |
| Peginterferon lambda | Hepatobiliary disorders/Biliary colic/Biliary colic                | 2022-01-27 / 2022-01-29 | Grade 3 / Not Related         | Recovered / Resolved / Not Applicable   | Yes      | No/No/No/Yes/No   |
| Peginterferon lambda | Infections and infestations/COVID-19/COVID-19                      | 2021-10-31 / 2021-10-31 | Grade 3 / Not Related         | Recovered / Resolved / Not Applicable   | Yes      | No/No/No/Yes/No   |
| Peginterferon lambda | Hepatobiliary disorders/Cholecystitis acute/Acute cholecystitis    | 2022-03-03 / 2022-03-04 | Grade 3 / Not Related         | Recovered / Resolved / Not Applicable   | Yes      | No/No/No/Yes/No   |
| Peginterferon lambda | Gastrointestinal disorders/Lumbar hernia/Lumbar hernia             | 2022-01-31 / 2022-01-31 | Grade 3 / Not Related         | Recovered / Resolved / Not Applicable   | Yes      | Yes/No/No/No/No   |

| Treatment            | System Organ Class / Preferred term / Verbatim Term                                     | Start Date / End Date   | Severity / Relationship to IP | Outcome / Study Drug Action Taken       | Serious? | IME/CA/DE/HO/LT ? |
|----------------------|-----------------------------------------------------------------------------------------|-------------------------|-------------------------------|-----------------------------------------|----------|-------------------|
| Peginterferon lambda | Infections and infestations/COVID-19 pneumonia/COVID-19 pneumonia                       | 2021-09-18 / 2021-09-25 | Grade 4 / Not Related         | Recovered / Resolved / Not Applicable   | Yes      | No/No/No/Yes/No   |
| Peginterferon lambda | Infections and infestations/COVID-19 pneumonia/COVID-19 pneumonia                       | 2021-11-19 / 2021-11-27 | Grade 4 / Not Related         | Recovered / Resolved / Not Applicable   | Yes      | No/No/No/Yes/No   |
| Peginterferon lambda | Infections and infestations/COVID-19 pneumonia/COVID-19 pneumonia                       | 2021-11-22 / 2021-12-01 | Grade 4 / Not Related         | Recovered / Resolved / Drug Interrupted | Yes      | No/No/No/Yes/No   |
| Peginterferon lambda | Infections and infestations/COVID-19 pneumonia/COVID-19 pneumonia                       | 2021-08-04 / 2021-09-05 | Grade 4 / Not Related         | Recovered / Resolved / Not Applicable   | Yes      | No/No/No/Yes/No   |
| Peginterferon lambda | Infections and infestations/COVID-19 pneumonia/COVID-19 pneumonia                       | 2021-09-13 / 2021-10-08 | Grade 4 / Not Related         | Recovered / Resolved / Not Applicable   | Yes      | No/No/No/Yes/No   |
| Peginterferon lambda | Infections and infestations/COVID-19 pneumonia/COVID-19 pneumonia                       | 2021-07-29 / 2021-08-08 | Grade 4 / Not Related         | Recovered / Resolved / Not Applicable   | Yes      | No/No/No/Yes/No   |
| Peginterferon lambda | Infections and infestations/COVID-19 pneumonia/COVID-19 pneumonia                       | 2022-01-26 / 2022-02-14 | Grade 4 / Not Related         | Recovering / Resolving / Not Applicable | Yes      | No/No/No/Yes/Yes  |
| Peginterferon lambda | Infections and infestations/COVID-19 pneumonia/COVID-19 pneumonia                       | 2021-11-08 / 2021-11-18 | Grade 4 / Not Related         | Recovered / Resolved / Not Applicable   | Yes      | Yes/No/No/Yes/No  |
| Peginterferon lambda | Infections and infestations/COVID-19 pneumonia/COVID-19 pneumonia                       | 2022-02-09 / 2022-02-17 | Grade 4 / Not Related         | Recovered / Resolved / Not Applicable   | Yes      | No/No/No/Yes/Yes  |
| Peginterferon lambda | Nervous system disorders/Epilepsy/Epilepsy                                              | 2021-10-01 / 2021-10-02 | Grade 5 / Not Related         | Fatal / Not Applicable                  | Yes      | No/No/Yes/Yes/Yes |
| Peginterferon lambda | Cardiac disorders/Myocardial infarction/Myocardial infarction                           | 2021-09-26 / 2021-09-26 | Grade 5 / Not Related         | Fatal / Not Applicable                  | Yes      | No/No/Yes/No/Yes  |
| Peginterferon lambda | Infections and infestations/COVID-19 pneumonia/COVID-19 pneumonia                       | 2021-09-11 / NA         | Grade 5 / Not Related         | Fatal / Drug Interrupted                | Yes      | No/No/No/Yes/No   |
| Peginterferon lambda | Injury, poisoning and procedural complications/Craniocerebral injury/Closed head injury | 2021-09-10 / 2021-10-03 | Grade 5 / Not Related         | Fatal / Not Applicable                  | Yes      | No/No/Yes/No/Yes  |

| Treatment | System Organ Class / Preferred term / Verbatim Term               | Start Date / End Date   | Severity / Relationship to IP | Outcome / Study Drug Action Taken         | Serious? | IME/CA/DE/HO/LT ? |
|-----------|-------------------------------------------------------------------|-------------------------|-------------------------------|-------------------------------------------|----------|-------------------|
| Placebo   | Infections and infestations/COVID-19 pneumonia/COVID-19 pneumonia | 2021-09-28 / 2021-10-01 | Grade 3 / Not Related         | Recovered / Resolved / Not Applicable     | Yes      | No/No/No/Yes/No   |
| Placebo   | Infections and infestations/COVID-19 pneumonia/COVID-19 pneumonia | 2021-07-01 / 2021-07-01 | Grade 3 / Not Related         | Recovered / Resolved / Dose Not Changed   | Yes      | No/No/No/No/No    |
| Placebo   | Infections and infestations/COVID-19 pneumonia/COVID-19 pneumonia | 2021-07-07 / 2021-07-13 | Grade 3 / Not Related         | Recovered / Resolved / Drug Interrupted   | Yes      | No/No/No/Yes/No   |
| Placebo   | Infections and infestations/COVID-19/COVID-19                     | 2021-09-26 / 2021-09-26 | Grade 3 / Not Related         | Recovered / Resolved / Not Applicable     | No       | NA/NA/NA/NA/NA    |
| Placebo   | Infections and infestations/COVID-19 pneumonia/COVID-19 pneumonia | 2021-07-21 / 2021-07-26 | Grade 3 / Not Related         | Recovered / Resolved / Not Applicable     | Yes      | No/No/No/Yes/No   |
| Placebo   | Infections and infestations/COVID-19 pneumonia/COVID-19 pneumonia | 2021-09-27 / 2021-10-01 | Grade 3 / Not Related         | Recovered / Resolved / Not Applicable     | Yes      | No/No/No/Yes/No   |
| Placebo   | Infections and infestations/COVID-19 pneumonia/COVID-19 pneumonia | 2021-07-19 / 2021-07-24 | Grade 3 / Not Related         | Recovered / Resolved / Not Applicable     | Yes      | No/No/No/Yes/No   |
| Placebo   | Infections and infestations/COVID-19 pneumonia/COVID-19 pneumonia | 2021-07-20 / 2021-07-30 | Grade 3 / Not Related         | Recovering / Resolving / Drug Interrupted | Yes      | No/No/No/Yes/No   |
| Placebo   | Infections and infestations/COVID-19 pneumonia/COVID-19 pneumonia | 2021-07-22 / 2021-07-23 | Grade 3 / Not Related         | Recovered / Resolved / Drug Interrupted   | Yes      | No/No/No/Yes/No   |
| Placebo   | Infections and infestations/COVID-19 pneumonia/COVID-19 pneumonia | 2021-08-05 / 2021-08-11 | Grade 3 / Not Related         | Recovered / Resolved / Not Applicable     | Yes      | No/No/No/Yes/No   |
| Placebo   | Infections and infestations/COVID-19/COVID-19                     | 2021-09-13 / 2021-09-13 | Grade 3 / Not Related         | Recovered / Resolved / Not Applicable     | No       | NA/NA/NA/NA/NA    |

| Treatment | System Organ Class / Preferred term / Verbatim Term               | Start Date / End Date   | Severity / Relationship to IP | Outcome / Study Drug Action Taken         | Serious? | IME/CA/DE/HO/LT ? |
|-----------|-------------------------------------------------------------------|-------------------------|-------------------------------|-------------------------------------------|----------|-------------------|
| Placebo   | Infections and infestations/COVID-19/COVID-19                     | 2021-09-23 / 2021-09-23 | Grade 3 / Not Related         | Recovered / Resolved / Not Applicable     | Yes      | Yes/No/No/No/No   |
| Placebo   | Infections and infestations/COVID-19 pneumonia/COVID-19 pneumonia | 2021-08-17 / 2021-08-20 | Grade 3 / Not Related         | Recovered / Resolved / Not Applicable     | Yes      | No/No/No/Yes/No   |
| Placebo   | Infections and infestations/COVID-19/COVID-19                     | 2021-09-08 / 2021-09-08 | Grade 3 / Not Related         | Recovered / Resolved / Not Applicable     | Yes      | No/No/No/No/No    |
| Placebo   | Infections and infestations/COVID-19 pneumonia/COVID-19 pneumonia | 2021-09-30 / 2021-10-06 | Grade 3 / Not Related         | Recovered / Resolved / Not Applicable     | Yes      | No/No/No/Yes/No   |
| Placebo   | Infections and infestations/COVID-19/COVID-19                     | 2021-09-29 / 2021-09-29 | Grade 3 / Not Related         | Recovered / Resolved / Not Applicable     | No       | NA/NA/NA/NA/NA    |
| Placebo   | Infections and infestations/COVID-19 pneumonia/COVID-19 pneumonia | 2021-10-06 / NA         | Grade 3 / Not Related         | Recovering / Resolving / Drug Interrupted | Yes      | No/No/No/Yes/No   |
| Placebo   | Psychiatric disorders/Suicide attempt/Suicide attempt             | 2021-10-06 / 2021-10-07 | Grade 3 / Not Related         | Recovered / Resolved / Not Applicable     | Yes      | No/No/No/Yes/No   |
| Placebo   | Infections and infestations/COVID-19/COVID-19                     | 2022-01-25 / 2022-01-25 | Grade 3 / Not Related         | Recovered / Resolved / Not Applicable     | Yes      | No/No/No/Yes/No   |
| Placebo   | Infections and infestations/COVID-19 pneumonia/COVID-19 pneumonia | 2021-07-08 / 2021-07-13 | Grade 3 / Not Related         | Recovered / Resolved / Drug Interrupted   | Yes      | No/No/No/Yes/No   |
| Placebo   | Infections and infestations/COVID-19/COVID-19                     | 2021-07-22 / 2021-07-22 | Grade 3 / Not Related         | Recovered / Resolved / Not Applicable     | Yes      | Yes/No/No/No/No   |
| Placebo   | Infections and infestations/COVID-19 pneumonia/COVID-19 pneumonia | 2021-07-30 / 2021-08-03 | Grade 3 / Not Related         | Recovered / Resolved / Not Applicable     | Yes      | No/No/No/Yes/No   |
| Placebo   | Infections and infestations/COVID-19 pneumonia/COVID-19 pneumonia | 2021-08-04 / 2021-08-11 | Grade 3 / Not Related         | Recovered / Resolved / Not Applicable     | Yes      | No/No/No/Yes/No   |

| Treatment | System Organ Class / Preferred term / Verbatim Term                                   | Start Date / End Date   | Severity / Relationship to IP | Outcome / Study Drug Action Taken       | Serious? | IME/CA/DE/HO/LT ? |
|-----------|---------------------------------------------------------------------------------------|-------------------------|-------------------------------|-----------------------------------------|----------|-------------------|
| Placebo   | Infections and infestations/COVID-19 pneumonia/COVID-19 pneumonia                     | 2021-09-06 / 2021-09-09 | Grade 3 / Not Related         | Recovered / Resolved / Not Applicable   | Yes      | No/No/No/Yes/No   |
| Placebo   | Infections and infestations/COVID-19/COVID-19                                         | 2022-01-10 / 2022-01-10 | Grade 3 / Not Related         | Recovered / Resolved / Not Applicable   | Yes      | Yes/No/No/No/No   |
| Placebo   | Renal and urinary disorders/Renal colic/Renal colic                                   | 2022-01-29 / 2022-01-29 | Grade 3 / Not Related         | Recovered / Resolved / Not Applicable   | Yes      | Yes/No/No/No/No   |
| Placebo   | Infections and infestations/COVID-19 pneumonia/COVID-19 pneumonia                     | 2022-02-14 / 2022-02-20 | Grade 3 / Not Related         | Recovered / Resolved / Not Applicable   | Yes      | No/No/No/Yes/No   |
| Placebo   | Infections and infestations/COVID-19 pneumonia/COVID-19 pneumonia                     | 2021-12-28 / 2022-01-02 | Grade 3 / Not Related         | Recovered / Resolved / Not Applicable   | Yes      | Yes/No/No/Yes/No  |
| Placebo   | Infections and infestations/COVID-19 pneumonia/COVID-19 pneumonia                     | 2022-01-29 / 2022-01-29 | Grade 3 / Not Related         | Recovered / Resolved / Not Applicable   | No       | NA/NA/NA/NA/NA    |
| Placebo   | Infections and infestations/COVID-19/COVID-19                                         | 2021-10-02 / 2021-10-02 | Grade 3 / Not Related         | Recovered / Resolved / Not Applicable   | Yes      | No/No/No/No/No    |
| Placebo   | Infections and infestations/COVID-19 pneumonia/COVID-19 pneumonia                     | 2021-08-15 / 2021-08-19 | Grade 3 / Not Related         | Recovered / Resolved / Not Applicable   | Yes      | No/No/No/Yes/No   |
| Placebo   | Respiratory, thoracic and mediastinal disorders/Pulmonary embolism/Pulmonary embolism | 2021-09-16 / 2021-10-01 | Grade 3 / Not Related         | Recovered / Resolved / Not Applicable   | Yes      | No/No/No/No/Yes   |
| Placebo   | Infections and infestations/COVID-19/COVID-19                                         | 2021-09-15 / 2021-09-16 | Grade 3 / Not Related         | Recovered / Resolved / Not Applicable   | Yes      | No/No/No/No/No    |
| Placebo   | Vascular disorders/Hypertensive crisis/Hypertensive crisis                            | 2022-01-19 / 2022-01-19 | Grade 3 / Not Related         | Recovered / Resolved / Dose Not Changed | No       | NA/NA/NA/NA/NA    |

| Treatment | System Organ Class / Preferred term / Verbatim Term                              | Start Date / End Date   | Severity / Relationship to IP | Outcome / Study Drug Action Taken       | Serious? | IME/CA/DE/HO/LT ? |
|-----------|----------------------------------------------------------------------------------|-------------------------|-------------------------------|-----------------------------------------|----------|-------------------|
| Placebo   | Infections and infestations/COVID-19 pneumonia/COVID-19 pneumonia                | 2022-01-25 / 2022-01-30 | Grade 3 / Not Related         | Recovered / Resolved / Not Applicable   | Yes      | No/No/No/Yes/No   |
| Placebo   | Infections and infestations/COVID-19/COVID-19                                    | 2022-01-23 / 2022-01-23 | Grade 3 / Not Related         | Recovered / Resolved / Not Applicable   | No       | NA/NA/NA/NA/NA    |
| Placebo   | Nervous system disorders/Headache/Headache                                       | 2022-02-10 / 2022-02-10 | Grade 3 / Not Related         | Recovered / Resolved / Not Applicable   | Yes      | Yes/Yes/No/No/No  |
| Placebo   | Injury, poisoning and procedural complications/Accident at work/Accident at work | 2021-12-17 / 2021-12-24 | Grade 3 / Not Related         | Recovered / Resolved / Not Applicable   | Yes      | No/No/No/Yes/No   |
| Placebo   | Infections and infestations/COVID-19/COVID-19                                    | 2022-01-17 / 2022-01-17 | Grade 3 / Not Related         | Recovered / Resolved / Not Applicable   | Yes      | Yes/No/No/No/No   |
| Placebo   | Infections and infestations/COVID-19 pneumonia/COVID-19 pneumonia                | 2022-01-16 / 2022-01-19 | Grade 3 / Not Related         | Recovered / Resolved / Not Applicable   | Yes      | No/No/No/Yes/No   |
| Placebo   | Infections and infestations/COVID-19/COVID-19                                    | 2022-02-02 / 2022-02-02 | Grade 3 / Not Related         | Recovered / Resolved / Not Applicable   | Yes      | Yes/No/No/No/No   |
| Placebo   | Infections and infestations/COVID-19/COVID-19                                    | 2022-01-19 / 2022-01-19 | Grade 3 / Not Related         | Recovered / Resolved / Dose Not Changed | No       | NA/NA/NA/NA/NA    |
| Placebo   | Infections and infestations/COVID-19 pneumonia/COVID-19 pneumonia                | 2022-01-21 / 2022-01-22 | Grade 3 / Not Related         | Recovered / Resolved / Not Applicable   | No       | NA/NA/NA/NA/NA    |
| Placebo   | Infections and infestations/COVID-19 pneumonia/COVID-19 pneumonia                | 2022-02-08 / 2022-02-11 | Grade 3 / Not Related         | Recovered / Resolved / Not Applicable   | Yes      | No/No/No/Yes/No   |
| Placebo   | Infections and infestations/COVID-19 pneumonia/COVID-19 pneumonia                | 2021-09-18 / 2021-10-01 | Grade 4 / Not Related         | Recovered / Resolved / Not Applicable   | Yes      | No/No/No/Yes/No   |

| Treatment | System Organ Class / Preferred term / Verbatim Term               | Start Date / End Date   | Severity / Relationship to IP | Outcome / Study Drug Action Taken       | Serious? | IME/CA/DE/HO/LT ? |
|-----------|-------------------------------------------------------------------|-------------------------|-------------------------------|-----------------------------------------|----------|-------------------|
| Placebo   | Infections and infestations/COVID-19 pneumonia/COVID-19 pneumonia | 2021-06-29 / 2021-07-11 | Grade 4 / Not Related         | Recovered / Resolved / Drug Interrupted | Yes      | Yes/No/No/Yes/No  |
| Placebo   | Infections and infestations/COVID-19 pneumonia/COVID-19 pneumonia | 2021-07-03 / 2021-08-17 | Grade 4 / Not Related         | Recovered / Resolved / Drug Interrupted | Yes      | No/No/No/Yes/No   |
| Placebo   | Infections and infestations/COVID-19 pneumonia/COVID-19 pneumonia | 2021-09-21 / 2021-09-29 | Grade 4 / Not Related         | Recovered / Resolved / Not Applicable   | Yes      | No/No/No/Yes/No   |
| Placebo   | Infections and infestations/COVID-19 pneumonia/COVID-19 pneumonia | 2021-10-11 / 2021-10-20 | Grade 4 / Not Related         | Recovered / Resolved / Not Applicable   | Yes      | No/No/No/Yes/No   |
| Placebo   | Infections and infestations/COVID-19 pneumonia/COVID-19 pneumonia | 2021-07-01 / 2021-07-12 | Grade 4 / Not Related         | Recovered / Resolved / Drug Interrupted | Yes      | No/No/No/Yes/No   |
| Placebo   | Infections and infestations/COVID-19 pneumonia/COVID-19 pneumonia | 2021-10-31 / 2021-11-28 | Grade 4 / Not Related         | Recovered / Resolved / Not Applicable   | Yes      | No/No/No/Yes/No   |
| Placebo   | Infections and infestations/COVID-19 pneumonia/COVID-19 pneumonia | 2021-10-08 / 2021-10-16 | Grade 4 / Not Related         | Recovered / Resolved / Not Applicable   | Yes      | No/No/No/Yes/No   |
| Placebo   | Infections and infestations/COVID-19 pneumonia/COVID-19 pneumonia | 2021-09-20 / 2021-10-23 | Grade 5 / Not Related         | Fatal / Not Applicable                  | Yes      | No/No/Yes/Yes/Yes |
| Placebo   | Infections and infestations/COVID-19 pneumonia/COVID-19 pneumonia | 2021-10-02 / 2021-10-22 | Grade 5 / Not Related         | Fatal / Not Applicable                  | Yes      | No/No/No/Yes/No   |
| Placebo   | Infections and infestations/COVID-19 pneumonia/COVID-19 pneumonia | 2021-06-29 / 2021-07-02 | Grade 5 / Not Related         | Fatal / Drug Interrupted                | Yes      | No/No/Yes/Yes/Yes |
| Placebo   | Infections and infestations/COVID-19 pneumonia/COVID-19 pneumonia | 2021-10-13 / 2021-10-20 | Grade 5 / Not Related         | Fatal / Not Applicable                  | Yes      | No/No/Yes/Yes/Yes |
| Placebo   | Infections and infestations/COVID-19 pneumonia/COVID-19 pneumonia | 2021-10-06 / 2021-10-19 | Grade 5 / Not Related         | Fatal / Not Applicable                  | Yes      | No/No/Yes/Yes/Yes |
| Placebo   | Infections and infestations/COVID-19 pneumonia/COVID-19 pneumonia | 2022-01-15 / 2022-02-09 | Grade 5 / Not Related         | Fatal / Not Applicable                  | Yes      | No/No/Yes/Yes/Yes |

676  
677

678 **Listing 2: Treatment emergent adverse events unlikely related, possibly related, or related to intervention**

| Treatment            | System Organ Class / Preferred term / Verbatim Term                   | Start Date / End Date   | Severity / Relationship to IP | Outcome / Study Drug Action Taken       | Serious? | IME/CA/DE/HO/LT ? |
|----------------------|-----------------------------------------------------------------------|-------------------------|-------------------------------|-----------------------------------------|----------|-------------------|
| Peginterferon lambda | General disorders and administration site conditions/Malaise/Sickness | 2021-09-22 / 2021-09-22 | Grade 1 / Unlikely Related    | Recovering / Resolving / Not Applicable | No       | NA/NA/NA/NA/NA    |
| Peginterferon lambda | Gastrointestinal disorders/Diarrhoea/Diarrhea                         | 2022-01-31 / 2022-01-31 | Grade 1 / Related             | Recovered / Resolved / Not Applicable   | No       | NA/NA/NA/NA/NA    |
| Peginterferon lambda | Nervous system disorders/Migraine/Migraine                            | 2022-01-18 / 2022-01-18 | Grade 1 / Related             | Recovered / Resolved / Not Applicable   | No       | NA/NA/NA/NA/NA    |
| Peginterferon lambda | Immune system disorders/Hypersensitivity/Allergic reaction            | 2022-01-15 / 2022-01-16 | Grade 1 / Related             | Recovering / Resolving / Not Applicable | No       | NA/NA/NA/NA/NA    |
| Peginterferon lambda | Investigations/Alanine aminotransferase increased/ALT increased       | 2021-12-29 / NA         | Grade 1 / Possibly Related    | Unknown / Not Applicable                | No       | NA/NA/NA/NA/NA    |
| Peginterferon lambda | Investigations/Aspartate aminotransferase increased/AST increased     | 2021-12-29 / 2022-01-05 | Grade 1 / Possibly Related    | Recovered / Resolved / Not Applicable   | No       | NA/NA/NA/NA/NA    |
| Peginterferon lambda | Skin and subcutaneous tissue disorders/Urticaria/Urticaria            | 2021-08-22 / 2021-08-24 | Grade 2 / Possibly Related    | Recovered / Resolved / Not Applicable   | No       | NA/NA/NA/NA/NA    |
| Peginterferon lambda | Skin and subcutaneous tissue disorders/Urticaria/Urticaria            | 2021-08-14 / 2021-08-14 | Grade 2 / Possibly Related    | Recovered / Resolved / Not Applicable   | No       | NA/NA/NA/NA/NA    |
| Peginterferon lambda | Skin and subcutaneous tissue disorders/Pruritus/Itchy skin            | 2022-01-23 / 2022-01-27 | Grade 2 / Related             | Recovered / Resolved / Not Applicable   | No       | NA/NA/NA/NA/NA    |
| Peginterferon lambda | Infections and infestations/COVID-19/COVID-19                         | 2021-11-15 / 2021-11-15 | Grade 2 / Unlikely Related    | Recovered / Resolved / Not Applicable   | No       | NA/NA/NA/NA/NA    |
| Peginterferon lambda | Skin and subcutaneous tissue disorders/Urticaria/Urticaria            | 2022-01-12 / 2022-01-12 | Grade 2 / Possibly Related    | Recovered / Resolved / Not Applicable   | No       | NA/NA/NA/NA/NA    |



| Treatment | System Organ Class / Preferred term / Verbatim Term                                           | Start Date / End Date   | Severity / Relationship to IP | Outcome / Study Drug Action Taken         | Serious? | IME/CA/DE/HO/LT ? |
|-----------|-----------------------------------------------------------------------------------------------|-------------------------|-------------------------------|-------------------------------------------|----------|-------------------|
| Placebo   | General disorders and administration site conditions/Influenza like illness/Flu like symptoms | 2022-01-25 / 2022-01-25 | Grade 1 / Related             | Recovering / Resolving / Not Applicable   | No       | NA/NA/NA/NA/NA    |
| Placebo   | Respiratory, thoracic and mediastinal disorders/Cough/Cough                                   | 2022-01-21 / 2022-01-21 | Grade 1 / Related             | Recovered / Resolved / Not Applicable     | No       | NA/NA/NA/NA/NA    |
| Placebo   | Ear and labyrinth disorders/Vertigo/Vertigo                                                   | 2021-07-21 / 2021-07-22 | Grade 1 / Possibly Related    | Recovered / Resolved / Dose Reduced       | No       | NA/NA/NA/NA/NA    |
| Placebo   | Vascular disorders/Orthostatic hypotension/Orthostatic hypotension                            | 2021-07-19 / 2021-07-21 | Grade 1 / Possibly Related    | Recovered / Resolved / Drug Interrupted   | No       | NA/NA/NA/NA/NA    |
| Placebo   | Ear and labyrinth disorders/Vertigo/Vertigo                                                   | 2021-07-26 / 2021-07-27 | Grade 1 / Possibly Related    | Recovered / Resolved / Dose Reduced       | No       | NA/NA/NA/NA/NA    |
| Placebo   | Ear and labyrinth disorders/Vertigo/Vertigo                                                   | 2021-07-20 / 2021-07-24 | Grade 1 / Possibly Related    | Recovered / Resolved / Dose Not Changed   | No       | NA/NA/NA/NA/NA    |
| Placebo   | Ear and labyrinth disorders/Vertigo/Vertigo                                                   | 2021-07-22 / 2021-07-22 | Grade 1 / Possibly Related    | Recovered / Resolved / Dose Increased     | No       | NA/NA/NA/NA/NA    |
| Placebo   | Skin and subcutaneous tissue disorders/Dermatitis allergic/Allergic skin reaction             | 2022-01-28 / 2022-01-30 | Grade 1 / Possibly Related    | Recovered / Resolved / Dose Not Changed   | No       | NA/NA/NA/NA/NA    |
| Placebo   | Vascular disorders/Orthostatic hypotension/Orthostatic hypotension                            | 2021-08-05 / 2021-08-05 | Grade 1 / Possibly Related    | Recovered / Resolved / Dose Not Changed   | No       | NA/NA/NA/NA/NA    |
| Placebo   | Vascular disorders/Hypotension/Hypotension                                                    | 2021-07-20 / 2021-07-20 | Grade 2 / Possibly Related    | Recovering / Resolving / Drug Interrupted | No       | NA/NA/NA/NA/NA    |
| Placebo   | General disorders and administration site conditions/Influenza like illness/Flu-like symptoms | 2021-07-18 / 2021-07-21 | Grade 2 / Unlikely Related    | Recovering / Resolving / Not Applicable   | No       | NA/NA/NA/NA/NA    |

| Treatment | System Organ Class / Preferred term / Verbatim Term        | Start Date / End Date   | Severity / Relationship to IP | Outcome / Study Drug Action Taken       | Serious? | IME/CA/DE/HO/LT ? |
|-----------|------------------------------------------------------------|-------------------------|-------------------------------|-----------------------------------------|----------|-------------------|
| Placebo   | Gastrointestinal disorders/Vomiting/Vomiting               | 2021-09-27 / 2021-09-28 | Grade 2 / Unlikely Related    | Recovered / Resolved / Not Applicable   | No       | NA/NA/NA/NA/NA    |
| Placebo   | Metabolism and nutrition disorders/Dehydration/Dehydration | 2021-09-27 / 2021-09-28 | Grade 2 / Unlikely Related    | Recovered / Resolved / Not Applicable   | No       | NA/NA/NA/NA/NA    |
| Placebo   | Vascular disorders/Hypotension/Hypotension                 | 2021-08-29 / 2021-09-01 | Grade 2 / Related             | Recovered / Resolved / Dose Reduced     | No       | NA/NA/NA/NA/NA    |
| Placebo   | Infections and infestations/COVID-19/COVID-19              | 2022-02-05 / 2022-02-06 | Grade 2 / Unlikely Related    | Recovered / Resolved / Dose Not Changed | No       | NA/NA/NA/NA/NA    |

679

680

681 **Instrument for assessing the Credibility of Effect Modification Analyses (ICEMAN)**  
682 in randomized controlled trials Version 1.0

- 683  
684 Quick instructions  
685 Synonyms for effect modification include subgroup effect, interaction, and moderation  
686 The instrument applies to a single proposed effect modification at a time; complete one form per each outcome, time-point,  
687 effect measure, and effect modifier  
688 Response options on the left indicate definitely or probably reduced, response options on the right probably or definitely  
689 increased credibility  
690 Completely unclear goes under probably reduced credibility  
691 It is helpful to provide a supporting comment or quotation under each question  
692 Whether an effect modification is patient-important is not part of the credibility assessment  
693 The manual provides more detailed instructions and examples  
694

695 **Preliminary considerations**

---

Study reference(s): NCT04727424  
If available, protocol reference(s): NCT04727424  
State a single outcome and, if applicable, time-point of interest (e.g., mortality at 1 year follow-up): **primary outcome, 28 days**  
State a single effect measure of interest (e.g., relative or absolute risk difference): **Risk ratio**  
State a single potential effect modifier of interest (e.g., age or comorbidity): **days since symptom onset, or vaccination status**  
Was the potential effect modifier measured before or at randomization?  yes, continue  no, stop here, refer to manual for further instructions

**Credibility assessment**

---

**1: Was the direction of the effect modification correctly hypothesized a priori?**

Definitely no                       Probably no or unclear                       Probably yes                       Definitely yes  
*Clearly post-hoc or results inconsistent with hypothesized direction or biologically very implausible*                      *Vague hypothesis*                      *hypothesized direction*                      *or No prior protocol available*                      *Prior protocol available and includes correct specification of direction or biologically very unclear*                      *priori hypothesis with correct direction of effect modification*                      *of effect modification, e.g., based on a biologic rationale*

Comment:

---

**2: Was the effect modification supported by prior evidence?**

Inconsistent with prior evidence                       Little or no support or unclear                       Some support                       Strong support  
*Prior evidence suggested a different direction of effect modification*                      *No prior evidence consistent with weak or very indirect prior evidence (e.g., animal study at high risk of bias) or unclear*                      *or Consistent with more limited indirect prior evidence (e.g., large observational study, non-significant effect modification in prior RCT, or in related RCT)*                      *Consistent with strong prior evidence directly applicable to the clinical scenario (e.g., significant effect modification in prior RCT, or in related RCT) different population)*

Comment:

---

**3: Does a test for interaction suggest that chance is an unlikely explanation of the apparent effect modification? (consider irrespective of number of effect modifiers) find strongest**

Chance a very likely explanation                       Chance a likely explanation or unclear                       Chance may not explain                       Chance an unlikely explanation  
*Interaction p-value >0.05*                      *Interaction p-value ≤0.05 and >0.01, or no test of interaction reported and not computable*                      *Interaction p-value ≤0.01*                      *Interaction p-value ≤0.005*

Comment:

---

**4: Did the authors test only a small number of effect modifiers or consider the number in their statistical analysis?**

Definitely no                       Probably no or unclear                       Probably yes                       Definitely yes

*Explicitly exploratory analysis or No mention of number or 4-10 No protocol available but Protocol available and 3 or fewer large number of effect modifiers effect modifiers tested and unequivocal statement of 3 or effect modifiers tested or number tested (e.g., greater than 10) and number not considered in analysis fewer effect modifiers tested considered in analysis multiplicity not considered in analysis*

Comment:

**5: If the effect modifier is a continuous variable, were arbitrary cut points avoided?**  not applicable: not continuous

Definitely no                       Probably no or unclear                       Probably yes                       Definitely yes

*Analysis based on exploratory cut point (e.g., picking cut point associated with highest interaction p-value)      Analysis based on cut point(s) of unclear origin      Analysis based on pre-specified cut points, e.g., suggested by RCT      Analysis based on the full continuum, e.g., assuming a linear or logarithmic relationship*

Comment:

**6 Optional: Are there any additional considerations that may increase or decrease credibility?** (manual section 2.6)

Yes, probably decrease                       Yes, probably increase

Comment:

**7: How would you rate the overall credibility of the proposed effect modification?**

The overall rating should be driven by the items that decrease credibility. The following provides a sensible strategy:

All responses definitely or probably reduced credibility or unclear → very low

Two or more responses definitely reduced credibility → maximum usually low even if all other responses satisfy credibility criteria

One response definitely reduced credibility → maximum usually moderate even if all other responses satisfy credibility criteria

**Two responses probably reduced credibility → maximum usually moderate even if all other responses satisfy credibility criteria**

No response options definitely or probably reduced credibility → high very likely

Place a mark on the continuous line (or type “x” in electronic version)

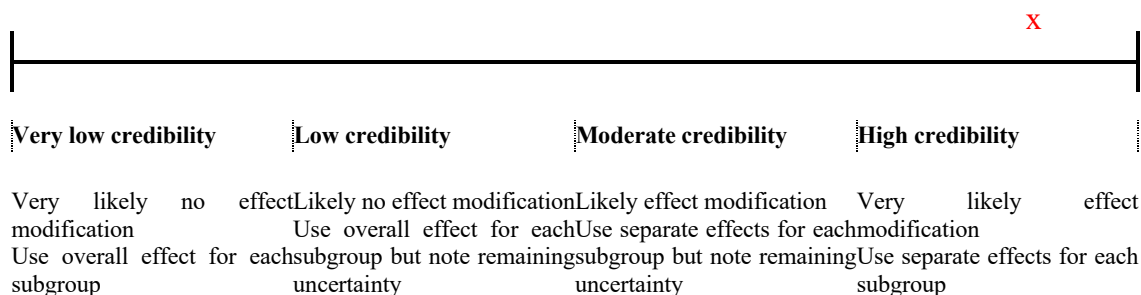

Comment:

696 The trial did not hypothesize any subgroup effects and no effect modification was found.  
 697  
 698  
 699  
 700

701 **References**

702

703 1. U.S. Department of Health and Human Services, Food and Drug Administration, Centre  
704 for Drug Evaluation and Research, Center for Biologics Evaluation and Research.  
705 COVID-19: Developing Drugs and Biological Products for Treatment or Prevention.  
706 2021;26.

707 2. brms: An R Package for Bayesian Multilevel Models Using Stan | Journal of Statistical  
708 Software [Internet]. [cited 2022 Jul 5];Available from:  
709 <https://www.jstatsoft.org/article/view/v080i01>

710 3. Mahani AS, Sharabiani MTA. Bayesian, and Non-Bayesian, Cause-Specific Competing-  
711 Risk Analysis for Parametric and Nonparametric Survival Functions: The R Package  
712 CFC. *Journal of Statistical Software* 2019;89:1–29.

713 4. Royston P, Parmar MKB. Restricted mean survival time: an alternative to the hazard ratio  
714 for the design and analysis of randomized trials with a time-to-event outcome. *BMC Med*  
715 *Res Methodol* 2013;13:152.

716 5. Lu X, Wang L, Sakthivel SK, et al. US CDC Real-Time Reverse Transcription PCR  
717 Panel for Detection of Severe Acute Respiratory Syndrome Coronavirus 2. *Emerg Infect*  
718 *Dis* 2020;26(8).

719 6. Feld JJ, Kandel C, Biondi MJ, et al. Peginterferon lambda for the treatment of outpatients  
720 with COVID-19: a phase 2, placebo-controlled randomised trial. *Lancet Respir Med*  
721 2021;9(5):498–510.

722 7. Garg S. Hospitalization Rates and Characteristics of Patients Hospitalized with  
723 Laboratory-Confirmed Coronavirus Disease 2019 — COVID-NET, 14 States, March 1–  
724 30, 2020. *MMWR Morb Mortal Wkly Rep* [Internet] 2020 [cited 2022 Jul 5];69.  
725 Available from: <https://www.cdc.gov/mmwr/volumes/69/wr/mm6915e3.htm>

726 8. Carethers JM. Insights into disparities observed with COVID-19. *J Intern Med*  
727 2021;289(4):463–73.

728 9. Kopel J, Perisetti A, Roghani A, Aziz M, Gajendran M, Goyal H. Racial and Gender-  
729 Based Differences in COVID-19. *Frontiers in Public Health* [Internet] 2020 [cited 2022  
730 Jul 5];8. Available from: <https://www.frontiersin.org/articles/10.3389/fpubh.2020.00418>

731
