# Supplementary material
Source: PubMed Central journal article supplement (PMC9933926)
Supplement: NEJMoa2209760_data-sharing.pdf [file NEJMoa2209760_data-sharing.pdf]

## Data Sharing Statement

Reis G, Silva EASM, Medeiros Silva DC, et al. Early Treatment with Pegylated Interferon Lambda for Covid-19. N Engl J Med. DOI: 10.1056/NEJMoa2209760.

| Question                                                            | Authors' Response                                                                                                                                                                                      |
|---------------------------------------------------------------------|--------------------------------------------------------------------------------------------------------------------------------------------------------------------------------------------------------|
| Will the data collected for your study be made available to others? | Yes                                                                                                                                                                                                    |
| Would you like to offer context for your decision?                  | —                                                                                                                                                                                                      |
| Which data?                                                         | Other (eg, partial data sets) — please describe                                                                                                                                                        |
| Additional information about data                                   | To be determined                                                                                                                                                                                       |
| How or where can the data be obtained?                              | Vivli.org<br><a href="https://search.vivli.org/studyDetails/fromSearch/2cff88cd-9e07-430f-8c4e-be660b9c233d">https://search.vivli.org/studyDetails/fromSearch/2cff88cd-9e07-430f-8c4e-be660b9c233d</a> |
| When will data availability begin?                                  | With publication                                                                                                                                                                                       |
| When will data availability end?                                    | NA                                                                                                                                                                                                     |
| Will any supporting documents be available?                         | —                                                                                                                                                                                                      |
| Which supporting documents?                                         | Analytic/Statistical code. Informed Consent Form                                                                                                                                                       |
| Additional information about supporting documents                   | —                                                                                                                                                                                                      |
| How or where can supporting documents be obtained?                  | togethertrial.com                                                                                                                                                                                      |
| When will supporting documents availability begin?                  | With publication                                                                                                                                                                                       |
| When will supporting documents availability end?                    | NA                                                                                                                                                                                                     |
| To whom will data be available?                                     | Researchers whose proposed use of the data has been approved                                                                                                                                           |
| For what type of analysis or purpose?                               | Analyses based on pre-planned analysis with a protocol.                                                                                                                                                |
| By what mechanism?                                                  | after approval of a proposal                                                                                                                                                                           |
| Any other restrictions?                                             | None                                                                                                                                                                                                   |
| Additional information                                              | Only data relevant to the publication will be provided per proposed protocols.                                                                                                                         |

This statement was posted on February 9, 2023, at NEJM.org.
