# Supplementary material
Source: PubMed Central journal article supplement (PMC9933926)
Supplement: NEJMoa2209760_disclosures.pdf [file NEJMoa2209760_disclosures.pdf]

Ana Almeida

**Discloser Identifier:** 992624

**Disclosure Purpose:** 22-09760

## Summary of Interests

I do not have any interests to disclose at this time.

## Additional Questions

1. **Are there other relationships or activities that readers could perceive to have influenced, or that give the appearance of potentially influencing, what you wrote in the submitted work?**

No.

2. **What is the manuscript title?**

Early Pegylated Interferon Lambda Treatment for COVID-19

3. **Are you the corresponding author?**

No.

## Certification

I certify that the information provided in this disclosure is complete and accurate.

Paul Arora

**Discloser Identifier:** 1086823

**Disclosure Purpose:** 22-09760

## Summary of Interests

### Company or Organization

| Entity                                                                                | Type       | Interest Held By                      |
|---------------------------------------------------------------------------------------|------------|---------------------------------------|
| Cytel                                                                                 | Employment | Self                                  |
| <i>Title:</i> Vice President, Advanced Epidemiology<br><i>Additional Information:</i> |            | <i>Position Description:</i> Employee |

## Additional Questions

1. **Are there other relationships or activities that readers could perceive to have influenced, or that give the appearance of potentially influencing, what you wrote in the submitted work?**

No.

2. **What is the manuscript title?**

Early Treatment with Pegylated Interferon Lambda among COVID-19 Patients

3. **Are you the corresponding author?**

No.

## Certification

I certify that the information provided in this disclosure is complete and accurate.

Mia Biondi

**Discloser Identifier:** 1086821

**Disclosure Purpose:** 22-09760

## Summary of Interests

I do not have any interests to disclose at this time.

## Additional Questions

1. **Are there other relationships or activities that readers could perceive to have influenced, or that give the appearance of potentially influencing, what you wrote in the submitted work?**

No.

2. **What is the manuscript title?**

EFFECT OF EARLY TREATMENT WITH PEGYLATED INTERFERON LAMBDA AMONG PATIENTS WITH COVID-19

3. **Are you the corresponding author?**

No.

## Certification

I certify that the information provided in this disclosure is complete and accurate.

Carina Bitaraes

**Discloser Identifier:** 1086937

**Disclosure Purpose:** 22-09760

## Summary of Interests

I do not have any interests to disclose at this time.

## Additional Questions

1. **Are there other relationships or activities that readers could perceive to have influenced, or that give the appearance of potentially influencing, what you wrote in the submitted work?**

No.

2. **What is the manuscript title?**

Early Pegylated Interferon Lambda Treatment for COVID-19

3. **Are you the corresponding author?**

No.

## Certification

I certify that the information provided in this disclosure is complete and accurate.

Eduardo Callegari

**Discloser Identifier:** 1047212

**Disclosure Purpose:** 22-09760

## Summary of Interests

I do not have any interests to disclose at this time.

## Additional Questions

1. **Are there other relationships or activities that readers could perceive to have influenced, or that give the appearance of potentially influencing, what you wrote in the submitted work?**

No.

2. **What is the manuscript title?**

Early Pegylated Interferon Lambda Treatment for COVID-19

3. **Are you the corresponding author?**

No.

## Certification

I certify that the information provided in this disclosure is complete and accurate.

Vitoria Campos

**Discloser Identifier:** 1047210

**Disclosure Purpose:** 22-09760

## Summary of Interests

I do not have any interests to disclose at this time.

## Additional Questions

1. **Are there other relationships or activities that readers could perceive to have influenced, or that give the appearance of potentially influencing, what you wrote in the submitted work?**

No.

2. **What is the manuscript title?**

Early Pegylated Inteferon Lambda Treatment for COVID-19

3. **Are you the corresponding author?**

No.

## Certification

I certify that the information provided in this disclosure is complete and accurate.

Ingrid Choong

**Discloser Identifier:** 979089

**Disclosure Purpose:** 22-09760

## Summary of Interests

I do not have any interests to disclose at this time.

## Additional Questions

1. **Are there other relationships or activities that readers could perceive to have influenced, or that give the appearance of potentially influencing, what you wrote in the submitted work?**

No.

2. **What is the manuscript title?**

Early Treatment with Pegylated Interferon Lambda Among COVID-19 Patients

3. **Are you the corresponding author?**

No.

## Certification

I certify that the information provided in this disclosure is complete and accurate.

Jordan Feld

Discloser Identifier: 565518

Disclosure Purpose: 22-09760

## Summary of Interests

### Company or Organization

| Entity                                                                                                                                                                                                                          | Type             | Interest Held By    |
|---------------------------------------------------------------------------------------------------------------------------------------------------------------------------------------------------------------------------------|------------------|---------------------|
| Eiger Biopharmaceuticals                                                                                                                                                                                                        | Grant / Contract | Other - Institution |
| <i>Recipient Name:</i> University Health Network<br><i>Grant / Contract Description:</i> Peginterferon lambda for COVID-19: medication (Phase II), funding (Phase III)<br><i>Additional Information:</i>                        |                  |                     |
| <i>Recipient Type:</i> Institution<br><i>Grant / Contract Purpose:</i> Research                                                                                                                                                 |                  |                     |
| Gilead Sciences                                                                                                                                                                                                                 | Grant / Contract | Other - Institution |
| <i>Recipient Name:</i> University Health Network<br><i>Grant / Contract Description:</i> Evaluation of tenofovir to prevent HBV reactivation, Evaluation of HCV treatment in psychiatric care<br><i>Additional Information:</i> |                  |                     |
| <i>Recipient Type:</i> Institution<br><i>Grant / Contract Purpose:</i> Research                                                                                                                                                 |                  |                     |
| Pardes Biosciences                                                                                                                                                                                                              | Consultant       | Self                |
| <i>Category:</i> Consultant<br><i>Description:</i><br><i>Additional Information:</i>                                                                                                                                            |                  |                     |

## Additional Questions

1. **Are there other relationships or activities that readers could perceive to have influenced, or that give the appearance of potentially influencing, what you wrote in the submitted work?**

No.

2. **What is the manuscript title?**

EFFECT OF EARLY TREATMENT WITH PEGYLATED INTERFERON LAMBDA AMONG PATIENTS WITH COVID-19

3. **Are you the corresponding author?**

No.

## Certification

I certify that the information provided in this disclosure is complete and accurate.





thaigo ferreira

**Discloser Identifier:** 1047209

**Disclosure Purpose:** 22-09760

## Summary of Interests

I do not have any interests to disclose at this time.

## Additional Questions

1. **Are there other relationships or activities that readers could perceive to have influenced, or that give the appearance of potentially influencing, what you wrote in the submitted work?**

No.

2. **What is the manuscript title?**

Early Treatment with Pegylated Interferon Lambda among COVID-19 Patients

3. **Are you the corresponding author?**

No.

## Certification

I certify that the information provided in this disclosure is complete and accurate.

# Adhemar Figueiredo Neto

**Discloser Identifier:** 992625

**Disclosure Purpose:** 22-09760

## Summary of Interests

I do not have any interests to disclose at this time.

## Additional Questions

1. **Are there other relationships or activities that readers could perceive to have influenced, or that give the appearance of potentially influencing, what you wrote in the submitted work?**

No.

2. **What is the manuscript title?**

Early Pegylated Interferon Lambda Treatment for COVID-19.

3. **Are you the corresponding author?**

No.

## Certification

I certify that the information provided in this disclosure is complete and accurate.

James Forrest

**Discloser Identifier:** 992607

**Disclosure Purpose:** 22-09760

## Summary of Interests

I do not have any interests to disclose at this time.

## Additional Questions

1. **Are there other relationships or activities that readers could perceive to have influenced, or that give the appearance of potentially influencing, what you wrote in the submitted work?**

No.

2. **What is the manuscript title?**

Early Pegylated Interferon Lambda Treatment for COVID-19

3. **Are you the corresponding author?**

No.

## Certification

I certify that the information provided in this disclosure is complete and accurate.

Adelino Freire

**Discloser Identifier:** 1107645

**Disclosure Purpose:** 22-09760

## Summary of Interests

I do not have any interests to disclose at this time.

## Additional Questions

1. **Are there other relationships or activities that readers could perceive to have influenced, or that give the appearance of potentially influencing, what you wrote in the submitted work?**

No.

2. **What is the manuscript title?**

Early Treatment with Pegylated Interferon Lambda among COVID-19 Patients

3. **Are you the corresponding author?**

No.

## Certification

I certify that the information provided in this disclosure is complete and accurate.

Jeffrey Glenn

Discloser Identifier: 350747

Disclosure Purpose: 22-09760

## Summary of Interests

### Company or Organization

| Entity                                                             | Type              | Interest Held By                                         |
|--------------------------------------------------------------------|-------------------|----------------------------------------------------------|
| Eiger BioPharmaceuticals                                           | Fiduciary Officer | Self                                                     |
| <i>Official Title:</i> Director<br><i>Additional Information:</i>  |                   | <i>Position Description:</i> Founder; Board of Directors |
| Eiger BioPharmaceuticals                                           | Stock             | Self                                                     |
| <i>Additional Information:</i>                                     |                   |                                                          |
| Eiger BioPharmaceuticals                                           | Stock Option      | Self                                                     |
| Additional Information:                                            |                   |                                                          |
| Eiger Group International, Inc.                                    | Fiduciary Officer | Self                                                     |
| <i>Official Title:</i> President<br><i>Additional Information:</i> |                   | <i>Position Description:</i>                             |
| Eiger Group International, Inc.                                    | Stock             | Self                                                     |
| <i>Additional Information:</i>                                     |                   |                                                          |

## Additional Questions

1. Are there other relationships or activities that readers could perceive to have influenced, or that give the appearance of potentially influencing, what you wrote in the submitted work?

No.

2. What is the manuscript title?

EFFECT OF EARLY TREATMENT WITH PEGYLATED INTERFERON LAMBDA AMONG PATIENTS WITH COVID-19

3. Are you the corresponding author?

No.

## Certification

I certify that the information provided in this disclosure is complete and accurate.



Christina Guo

**Discloser Identifier:** 1070109

**Disclosure Purpose:** 22-09760

## Summary of Interests

I do not have any interests to disclose at this time.

## Additional Questions

1. **Are there other relationships or activities that readers could perceive to have influenced, or that give the appearance of potentially influencing, what you wrote in the submitted work?**

No.

2. **What is the manuscript title?**

Early Treatment with Pegylated Interferon Lambda among COVID-19 Patients

3. **Are you the corresponding author?**

No.

## Certification

I certify that the information provided in this disclosure is complete and accurate.



Gordon Guyatt

**Discloser Identifier:** 332056

**Disclosure Purpose:** 22-09760

## Summary of Interests

I do not have any interests to disclose at this time.

## Additional Questions

1. **Are there other relationships or activities that readers could perceive to have influenced, or that give the appearance of potentially influencing, what you wrote in the submitted work?**

No.

2. **What is the manuscript title?**

Early Pegylated Interferon Lambda Treatment for COVID-19

3. **Are you the corresponding author?**

No.

## Certification

I certify that the information provided in this disclosure is complete and accurate.

Bettina Hansen

**Discloser Identifier:** 874067

**Disclosure Purpose:** 22-09760

## Summary of Interests

### Company or Organization

| Entity                                                                                                                                       | Type       | Interest Held By |
|----------------------------------------------------------------------------------------------------------------------------------------------|------------|------------------|
| Eiger BioPharmaceuticals                                                                                                                     | Consultant | Self             |
| <i>Category:</i> Consultant<br><i>Description:</i> Biostatistical advice in design and analysis of studies<br><i>Additional Information:</i> |            |                  |

## Additional Questions

1. **Are there other relationships or activities that readers could perceive to have influenced, or that give the appearance of potentially influencing, what you wrote in the submitted work?**

No.

2. **What is the manuscript title?**

Early Treatment with Pegylated Interferon Lambda among COVID-19 Patients

3. **Are you the corresponding author?**

No.

## Certification

I certify that the information provided in this disclosure is complete and accurate.

Ofir Harari

**Discloser Identifier:** 992608

**Disclosure Purpose:** 22-09760

## Summary of Interests

I do not have any interests to disclose at this time.

## Additional Questions

1. **Are there other relationships or activities that readers could perceive to have influenced, or that give the appearance of potentially influencing, what you wrote in the submitted work?**

No.

2. **What is the manuscript title?**

Early Treatment with Pegylated Interferon Lambda among COVID-19 Patients

3. **Are you the corresponding author?**

No.

## Certification

I certify that the information provided in this disclosure is complete and accurate.

Colin Hislop

**Discloser Identifier:** 979088

**Disclosure Purpose:** 22-09760

## Summary of Interests

I do not have any interests to disclose at this time.

## Additional Questions

1. **Are there other relationships or activities that readers could perceive to have influenced, or that give the appearance of potentially influencing, what you wrote in the submitted work?**

No.

2. **What is the manuscript title?**

EARLY TREATMENT WITH PEGYLATED INTERFERON LAMBDA AMONG PATIENTS WITH COVID-19

3. **Are you the corresponding author?**

No.

## Certification

I certify that the information provided in this disclosure is complete and accurate.

Christopher Kandel

**Discloser Identifier:** 400288

**Disclosure Purpose:** 22-09760

## Summary of Interests

I do not have any interests to disclose at this time.

## Additional Questions

1. **Are there other relationships or activities that readers could perceive to have influenced, or that give the appearance of potentially influencing, what you wrote in the submitted work?**

No.

2. **What is the manuscript title?**

Early Treatment with Pegylated Interferon Lambda among COVID-19 Patients

3. **Are you the corresponding author?**

No.

## Certification

I certify that the information provided in this disclosure is complete and accurate.

# Steve Kanters

**Discloser Identifier:** 1086820

**Disclosure Purpose:** 22-09760

## Summary of Interests

### Company or Organization

| Entity                                                   | Type       | Interest Held By             |
|----------------------------------------------------------|------------|------------------------------|
| RainCity Analytics                                       | Employment | Self                         |
| <i>Title:</i> Director<br><i>Additional Information:</i> |            | <i>Position Description:</i> |

## Additional Questions

1. **Are there other relationships or activities that readers could perceive to have influenced, or that give the appearance of potentially influencing, what you wrote in the submitted work?**

No.

2. **What is the manuscript title?**

EARLY PEGYLATED INTERFERON LAMBDA TREATMENT FOR COVID-19

3. **Are you the corresponding author?**

No.

## Certification

I certify that the information provided in this disclosure is complete and accurate.

Robert Kozak

**Discloser Identifier:** 983756

**Disclosure Purpose:** 22-09760

## Summary of Interests

I do not have any interests to disclose at this time.

## Additional Questions

1. **Are there other relationships or activities that readers could perceive to have influenced, or that give the appearance of potentially influencing, what you wrote in the submitted work?**

No.

2. **What is the manuscript title?**

Early Treatment with Pegylated interferon lambda among COVID-19 patients

3. **Are you the corresponding author?**

No.

## Certification

I certify that the information provided in this disclosure is complete and accurate.

**Discloser Identifier:** 1086819

**Disclosure Purpose:** 22-09760

## Summary of Interests

### Company or Organization

| Entity                                                             | Type       | Interest Held By             |
|--------------------------------------------------------------------|------------|------------------------------|
| Raincity analytics                                                 | Employment | Self                         |
| <i>Title:</i> Associate Director<br><i>Additional Information:</i> |            | <i>Position Description:</i> |

## Additional Questions

1. **Are there other relationships or activities that readers could perceive to have influenced, or that give the appearance of potentially influencing, what you wrote in the submitted work?**

No.

2. **What is the manuscript title?**

Early Pegylated Interferon Lambda Treatment for COVID-19

3. **Are you the corresponding author?**

No.

## Certification

I certify that the information provided in this disclosure is complete and accurate.



Paula McKay

**Discloser Identifier:** 674367

**Disclosure Purpose:** 22-09760

## Summary of Interests

I do not have any interests to disclose at this time.

## Additional Questions

1. **Are there other relationships or activities that readers could perceive to have influenced, or that give the appearance of potentially influencing, what you wrote in the submitted work?**

No.

2. **What is the manuscript title?**

Early Treatment with Pegylated Interferon Lambda among COVID-19 Patients

3. **Are you the corresponding author?**

No.

## Certification

I certify that the information provided in this disclosure is complete and accurate.

Aline Milagres

**Discloser Identifier:** 992627

**Disclosure Purpose:** 22-09760

## Summary of Interests

I do not have any interests to disclose at this time.

## Additional Questions

1. **Are there other relationships or activities that readers could perceive to have influenced, or that give the appearance of potentially influencing, what you wrote in the submitted work?**

No.

2. **What is the manuscript title?**

Early Pegylated Interferon Lambda Treatment for COVID-19

3. **Are you the corresponding author?**

No.

## Certification

I certify that the information provided in this disclosure is complete and accurate.

Discloser Identifier: 930612

Disclosure Purpose: 22-09760

## Summary of Interests

I do not have any interests to disclose at this time.

## Additional Questions

1. **Are there other relationships or activities that readers could perceive to have influenced, or that give the appearance of potentially influencing, what you wrote in the submitted work?**

No.

2. **What is the manuscript title?**

EFFECT OF EARLY TREATMENT WITH PEGYLATED INTERFERON LAMBDA AMONG PATIENTS WITH COVID-19

3. **Are you the corresponding author?**

Yes.

- a. **Please list the other authors' names here.**

Gilmar Reis, MD, PhD;1,2,3,4 Eduardo Augusto dos Santos Moreira Silva, MD, PhD;2,3 Daniela Carla Medeiros Silva, MD, PhD;2,3 Lehana Thabane, PhD;4 Vitoria Helena de Souza Campos;2,3 Thiago Santiago Ferreira, MD;2 Castilho Vitor Quirino dos Santos;2,3 Ana Maria Ribeiro Nogueira, MD;6 Ana Paula Figueiredo Guimaraes Almeida, MD;7 Leonardo Cançado Monteiro Savassi, MD, PhD;5 Adhemar Dias de Figueiredo Neto MD, PhD;8 Ana Carolina Fialho Dias Rocha, PhD;2 Carina Bitarães, RN;5,6 Aline Cruz Milagres, RN;5,6 Eduardo Diniz Callegari, MD;7 Maria Izabel Campos Simplicio, BScPharm;2 Luciene Barra Ribeiro, RN, MPH;2 Rosemary Oliveira;2 Ofir Harari, PhD;10 Lindsay A Wilson, MSc;1 Jamie I. Forrest, PhD, MPH;11 Hinda Ruton, MSc;10 Sheila Sprague, PhD;4 Paula McKay, MSc;4 Christina M. Guo, BCom;11 Eve Limbrick-Oldfield, PhD;12 Steve Kanters, PhD;12 Gordon H. Guyatt, MD;4 Craig R. Rayner, PharmD, FRCP Edin;13, 14 Christopher Kandel MD;15 Mia J. Biondi PhD;16 Robert Kozak PhD;17 Bettina Hansen PhD;9,18 M. Atif Zahoor PhD;19 Paul Arora, PhD;10 Colin Hislop, M.B.B.S;19 Ingrid Choong, PhD;19 Jordan J. Feld, MD, MPH;20 Jeffrey S. Glenn, MD, PhD

## Certification

I certify that the information provided in this disclosure is complete and accurate.

Ana Maria Nogueira

**Discloser Identifier:** 1047211

**Disclosure Purpose:** 22-09760

## Summary of Interests

I do not have any interests to disclose at this time.

## Additional Questions

1. **Are there other relationships or activities that readers could perceive to have influenced, or that give the appearance of potentially influencing, what you wrote in the submitted work?**

No.

2. **What is the manuscript title?**

Early Pegylated Interferon Lambda Treatment for COVID-19

3. **Are you the corresponding author?**

No.

## Certification

I certify that the information provided in this disclosure is complete and accurate.

Rosemary Oliveira

**Discloser Identifier:** 992632

**Disclosure Purpose:** 22-09760

## Summary of Interests

I do not have any interests to disclose at this time.

## Additional Questions

1. **Are there other relationships or activities that readers could perceive to have influenced, or that give the appearance of potentially influencing, what you wrote in the submitted work?**

No.

2. **What is the manuscript title?**

Early Treatment with Pegylated Interferon Lambda among COVID-19 patients

3. **Are you the corresponding author?**

No.

## Certification

I certify that the information provided in this disclosure is complete and accurate.

Discloser Identifier: 1047216

Disclosure Purpose: 22-09760

## Summary of Interests

### Company or Organization

| Entity                                                                                                                                                                                                                                                                                                                                                                                                | Type             | Interest Held By |
|-------------------------------------------------------------------------------------------------------------------------------------------------------------------------------------------------------------------------------------------------------------------------------------------------------------------------------------------------------------------------------------------------------|------------------|------------------|
| AstraZeneca                                                                                                                                                                                                                                                                                                                                                                                           | Grant / Contract | Other - Certara  |
| <p><i>Recipient Name:</i> Certara<br/> <i>Grant / Contract Description:</i> Provision of clinical pharmacology and drug development advice<br/> <i>Additional Information:</i> I am an employee of Certara</p> <p><i>Recipient Type:</i> Institution<br/> <i>Grant / Contract Purpose:</i> Research</p>                                                                                               |                  |                  |
| Bill and Melinda Gates Foundation                                                                                                                                                                                                                                                                                                                                                                     | Grant / Contract | Other - Certara  |
| <p><i>Recipient Name:</i> Certara<br/> <i>Grant / Contract Description:</i> Certara has received financial support to provide scientific input into various COVID activities<br/> <i>Additional Information:</i> I am an employee of Certara which is a consulting organization in medicine development.</p> <p><i>Recipient Type:</i> Institution<br/> <i>Grant / Contract Purpose:</i> Research</p> |                  |                  |
| Certara                                                                                                                                                                                                                                                                                                                                                                                               | Employment       | Self             |
| <p><i>Title:</i> Certara Distinguished Scientist<br/> <i>Additional Information:</i> I am employed by Certara</p> <p><i>Position Description:</i> Various positions over tenure, main role is provide drug development advice to clients as consultant.</p>                                                                                                                                           |                  |                  |
| Certara                                                                                                                                                                                                                                                                                                                                                                                               | Stock            | Self             |
| <i>Additional Information:</i>                                                                                                                                                                                                                                                                                                                                                                        |                  |                  |
| CSIRO                                                                                                                                                                                                                                                                                                                                                                                                 | Grant / Contract | Other - Certara  |
| <p><i>Recipient Name:</i> Certara<br/> <i>Grant / Contract Description:</i> Provision of drug development advice and strategic advice on pandemic preparedness<br/> <i>Additional Information:</i> I am an employee of Certara</p> <p><i>Recipient Type:</i> Institution<br/> <i>Grant / Contract Purpose:</i> Research</p>                                                                           |                  |                  |
| Daichi Sankyo                                                                                                                                                                                                                                                                                                                                                                                         | Grant / Contract | Other - Certara  |
| <p><i>Recipient Name:</i> Certara<br/> <i>Grant / Contract Description:</i> Provision of quantitative pharmacology and drug development advice<br/> <i>Additional Information:</i> I am an employee of Certara</p> <p><i>Recipient Type:</i> Institution<br/> <i>Grant / Contract Purpose:</i> Research</p>                                                                                           |                  |                  |
| Department of Health                                                                                                                                                                                                                                                                                                                                                                                  | Grant / Contract | Other - Certara  |
| <p><i>Recipient Name:</i> Certara<br/> <i>Grant / Contract Description:</i> Australian gov department of health for advice on putative COVID therapeutics<br/> <i>Additional Information:</i></p> <p><i>Recipient Type:</i> Institution<br/> <i>Grant / Contract Purpose:</i> Other - Advice on putative therapeutics</p>                                                                             |                  |                  |
| medicines development for global health                                                                                                                                                                                                                                                                                                                                                               | Grant / Contract | Other - Certara  |

| Entity                                                                                                                                                                                                                                                                                                                                       | Type             | Interest Held By |
|----------------------------------------------------------------------------------------------------------------------------------------------------------------------------------------------------------------------------------------------------------------------------------------------------------------------------------------------|------------------|------------------|
| <i>Recipient Name:</i> Certara<br><i>Grant / Contract Description:</i> Clinical pharmacology and drug development advice<br><i>Additional Information:</i> I am an employee of Certara that regularly consults to Medicines Development for Global Health<br><i>Recipient Type:</i> Institution<br><i>Grant / Contract Purpose:</i> Research |                  |                  |
| Merck                                                                                                                                                                                                                                                                                                                                        | Grant / Contract | Other - Certara  |
| <i>Recipient Name:</i> Certara<br><i>Grant / Contract Description:</i> Provision of clinical pharmacology and drug development advice<br><i>Additional Information:</i> I am an employee of Certara<br><i>Recipient Type:</i> Institution<br><i>Grant / Contract Purpose:</i> Research                                                       |                  |                  |
| novaquest                                                                                                                                                                                                                                                                                                                                    | Grant / Contract | Other - Certara  |
| <i>Recipient Name:</i> Certara<br><i>Grant / Contract Description:</i> Drug development due diligence advice<br><i>Additional Information:</i> I am an employee of Certara<br><i>Recipient Type:</i> Institution<br><i>Grant / Contract Purpose:</i> Research                                                                                |                  |                  |
| Pfizer                                                                                                                                                                                                                                                                                                                                       | Grant / Contract | Other - Certara  |
| <i>Recipient Name:</i> Certara<br><i>Grant / Contract Description:</i> Provision of clinical pharmacology and drug development advice<br><i>Additional Information:</i> I am an employee of Certara<br><i>Recipient Type:</i> Institution<br><i>Grant / Contract Purpose:</i> Research                                                       |                  |                  |
| Regeneron Pharmaceuticals                                                                                                                                                                                                                                                                                                                    | Grant / Contract | Other - Certara  |
| <i>Recipient Name:</i> Certara<br><i>Grant / Contract Description:</i> Provision of clinical pharmacology and drug development advice<br><i>Additional Information:</i> I am an employee of Certara<br><i>Recipient Type:</i> Institution<br><i>Grant / Contract Purpose:</i> Research                                                       |                  |                  |

## Additional Questions

1. **Are there other relationships or activities that readers could perceive to have influenced, or that give the appearance of potentially influencing, what you wrote in the submitted work?**

Yes.

- a. **Please describe those relationships.**

I am an employee of Certara. Certara is an organization that broadly consults to pharmaceutical, government and NGOs. With an abundance of caution and transparency I have included such examples in the disclosure.

2. **What is the manuscript title?**

Early Treatment with Pegylated Interferon Lambda among COVID-19 Patients

3. **Are you the corresponding author?**

No.

## Certification

I certify that the information provided in this disclosure is complete and accurate.





Gilmar Reis

**Discloser Identifier:** 992600

**Disclosure Purpose:** 22-09760

## Summary of Interests

I do not have any interests to disclose at this time.

## Additional Questions

1. **Are there other relationships or activities that readers could perceive to have influenced, or that give the appearance of potentially influencing, what you wrote in the submitted work?**

No.

2. **What is the manuscript title?**

Early Pegylated Interferon Lambda Treatment for COVID-19

3. **Are you the corresponding author?**

No.

## Certification

I certify that the information provided in this disclosure is complete and accurate.

Luciene Ribeiro

**Discloser Identifier:** 992631

**Disclosure Purpose:** 22-09760

## Summary of Interests

I do not have any interests to disclose at this time.

## Additional Questions

1. **Are there other relationships or activities that readers could perceive to have influenced, or that give the appearance of potentially influencing, what you wrote in the submitted work?**

No.

2. **What is the manuscript title?**

Early Pegylated interferon lambda treatment for covid-19

3. **Are you the corresponding author?**

No.

## Certification

I certify that the information provided in this disclosure is complete and accurate.

Ana Carolina Rocha

**Discloser Identifier:** 1086935

**Disclosure Purpose:** 22-09760

## Summary of Interests

I do not have any interests to disclose at this time.

## Additional Questions

1. **Are there other relationships or activities that readers could perceive to have influenced, or that give the appearance of potentially influencing, what you wrote in the submitted work?**

No.

2. **What is the manuscript title?**

Early Pegylated Interferon Lambda Treatment for COVID-19

3. **Are you the corresponding author?**

No.

## Certification

I certify that the information provided in this disclosure is complete and accurate.

Hinda Ruton

**Discloser Identifier:** 1047213

**Disclosure Purpose:** 22-09760

## Summary of Interests

I do not have any interests to disclose at this time.

## Additional Questions

1. **Are there other relationships or activities that readers could perceive to have influenced, or that give the appearance of potentially influencing, what you wrote in the submitted work?**

No.

2. **What is the manuscript title?**

Early Treatment with Pegylated Interferon Lambda among COVID-19 Patients

3. **Are you the corresponding author?**

No.

## Certification

I certify that the information provided in this disclosure is complete and accurate.

Castilho Santos

**Discloser Identifier:** 992623

**Disclosure Purpose:** 22-09760

## Summary of Interests

I do not have any interests to disclose at this time.

## Additional Questions

1. **Are there other relationships or activities that readers could perceive to have influenced, or that give the appearance of potentially influencing, what you wrote in the submitted work?**

No.

2. **What is the manuscript title?**

Early Pegylated Interferon Lambda Treatment for COVID-19

3. **Are you the corresponding author?**

No.

## Certification

I certify that the information provided in this disclosure is complete and accurate.

Leonardo Savassi

**Discloser Identifier:** 992626

**Disclosure Purpose:** 22-09760

## Summary of Interests

I do not have any interests to disclose at this time.

## Additional Questions

1. **Are there other relationships or activities that readers could perceive to have influenced, or that give the appearance of potentially influencing, what you wrote in the submitted work?**

No.

2. **What is the manuscript title?**

Early Pegylated Interferon Lambda Treatment for COVID-19

3. **Are you the corresponding author?**

No.

## Certification

I certify that the information provided in this disclosure is complete and accurate.

Daniela Carla Silva

**Discloser Identifier:** 992603

**Disclosure Purpose:** 22-09760

## Summary of Interests

I do not have any interests to disclose at this time.

## Additional Questions

1. **Are there other relationships or activities that readers could perceive to have influenced, or that give the appearance of potentially influencing, what you wrote in the submitted work?**

No.

2. **What is the manuscript title?**

Early Pegylated Interferon Lambda Treatment for COVID-19

3. **Are you the corresponding author?**

No.

## Certification

I certify that the information provided in this disclosure is complete and accurate.

EDUARDO AUGUSTO DOS SANTOS SILVA

**Discloser Identifier:** 992601

**Disclosure Purpose:** 22-09760

## Summary of Interests

I do not have any interests to disclose at this time.

## Additional Questions

1. **Are there other relationships or activities that readers could perceive to have influenced, or that give the appearance of potentially influencing, what you wrote in the submitted work?**

No.

2. **What is the manuscript title?**

Early Pegylated Interferon Lambda Treatment for COVID-19

3. **Are you the corresponding author?**

No.

## Certification

I certify that the information provided in this disclosure is complete and accurate.



Maria Izabel Simplicio

**Discloser Identifier:** 992630

**Disclosure Purpose:** 22-09760

## Summary of Interests

I do not have any interests to disclose at this time.

## Additional Questions

1. **Are there other relationships or activities that readers could perceive to have influenced, or that give the appearance of potentially influencing, what you wrote in the submitted work?**

No.

2. **What is the manuscript title?**

Early Pegylated Interferon Lambda Treatment for COVID-19

3. **Are you the corresponding author?**

No.

## Certification

I certify that the information provided in this disclosure is complete and accurate.

Sheila Sprague

**Discloser Identifier:** 620661

**Disclosure Purpose:** 22-09760

## Summary of Interests

I do not have any interests to disclose at this time.

## Additional Questions

1. **Are there other relationships or activities that readers could perceive to have influenced, or that give the appearance of potentially influencing, what you wrote in the submitted work?**

No.

2. **What is the manuscript title?**

Early Treatment with Pegylated Interferon Lambda among COVID-19 Patients

3. **Are you the corresponding author?**

No.

## Certification

I certify that the information provided in this disclosure is complete and accurate.

Lehana Thabane

**Discloser Identifier:** 415383

**Disclosure Purpose:** 22-09760

## Summary of Interests

I do not have any interests to disclose at this time.

## Additional Questions

1. **Are there other relationships or activities that readers could perceive to have influenced, or that give the appearance of potentially influencing, what you wrote in the submitted work?**

No.

2. **What is the manuscript title?**

EFFECT OF EARLY TREATMENT WITH PEGYLATED INTERFERON LAMBDA AMONG PATIENTS WITH COVID-1

3. **Are you the corresponding author?**

No.

## Certification

I certify that the information provided in this disclosure is complete and accurate.

Lindsay Wilson

**Discloser Identifier:** 1091283

**Disclosure Purpose:** 22-09760

## Summary of Interests

I do not have any interests to disclose at this time.

## Additional Questions

1. **Are there other relationships or activities that readers could perceive to have influenced, or that give the appearance of potentially influencing, what you wrote in the submitted work?**

No.

2. **What is the manuscript title?**

EFFECT OF EARLY TREATMENT WITH PEGYLATED INTERFERON LAMBDA AMONG PATIENTS WITH COVID-19

3. **Are you the corresponding author?**

No.

## Certification

I certify that the information provided in this disclosure is complete and accurate.

Muhammad Atif Zahoor

**Discloser Identifier:** 874064

**Disclosure Purpose:** 22-09760

## Summary of Interests

I do not have any interests to disclose at this time.

## Additional Questions

1. **Are there other relationships or activities that readers could perceive to have influenced, or that give the appearance of potentially influencing, what you wrote in the submitted work?**

No.

2. **What is the manuscript title?**

Early Pegylated Interferon Lambda Treatment for COVID-19

3. **Are you the corresponding author?**

No.

## Certification

I certify that the information provided in this disclosure is complete and accurate.
